# Supplementary material for: Metabolomics Combined with Sensory Analysis Reveals the Impact of Different Extraction Methods on Coffee Beverages from Coffea arabica and Coffea canephora var. Robusta
Source: MDPI journal article supplement (doi:10.3390/foods11060807), 2022-03-11
Supplement: s1 [file s1]

|          |      |         |                                                                                                                                        |
|----------|------|---------|----------------------------------------------------------------------------------------------------------------------------------------|
| Prodotto | Data | Giudice |  <b>Trialcard Plus - Caffè espresso</b><br>16.06.2016 |
|----------|------|---------|----------------------------------------------------------------------------------------------------------------------------------------|

| <b>Codice giudice</b><br>A B C D E F G H I L M N O P Q R S T U V Z<br>A B C D E F G H I L M N O P Q R S T U V Z |                             |                        |                                   |                     |                     |
|-----------------------------------------------------------------------------------------------------------------|-----------------------------|------------------------|-----------------------------------|---------------------|---------------------|
| <b>Codice serie</b><br>0 1 2 3 4 5 6 7 8 9    0 1 2 3 4 5 6 7 8 9<br>0 1 2 3 4 5 6 7 8 9                        |                             | <b>Codice campione</b> |                                   |                     |                     |
| <i>Sezione descrittori codificati</i>                                                                           |                             | 0 1 2 3 4 5 6 7 8 9    | <i>Sezione descrittori liberi</i> | 0 1 2 3 4 5 6 7 8 9 |                     |
| <b>Percezione visiva</b>                                                                                        | Intensità colore _____      | O O O O O O O O O O    | Percezione visiva                 | _____               | O O O O O O O O O O |
|                                                                                                                 | Tessitura _____             | O O O O O O O O O O    |                                   | _____               | O O O O O O O O O O |
|                                                                                                                 | ■ ATTRAENZA                 | O O O O O O O O O O    |                                   | _____               | O O O O O O O O O O |
| <b>Percezione olfattiva</b>                                                                                     | Intensità olfattiva _____   | O O O O O O O O O O    | Percezione olfattiva              | _____               | O O O O O O O O O O |
|                                                                                                                 | ■ PIACEVOLEZZA OLIF.        | O O O O O O O O O O    |                                   | _____               | O O O O O O O O O O |
| <b>Percezione tattile/gustativa</b>                                                                             | Corpo _____                 | O O O O O O O O O O    | Percezione tattile/gustativa      | _____               | O O O O O O O O O O |
|                                                                                                                 | Acido _____                 | O O O O O O O O O O    |                                   | _____               | O O O O O O O O O O |
|                                                                                                                 | Amaro _____                 | O O O O O O O O O O    |                                   | _____               | O O O O O O O O O O |
|                                                                                                                 | Astringenza _____           | O O O O O O O O O O    |                                   | _____               | O O O O O O O O O O |
|                                                                                                                 | ■ EQUILIBRIO                | O O O O O O O O O O    |                                   | _____               | O O O O O O O O O O |
| <b>Percezione retroolfattiva</b>                                                                                | Fiori e frutta fresca _____ | O O O O O O O O O O    | Percezione retroolfattiva         | _____               | O O O O O O O O O O |
|                                                                                                                 | Vegetale _____              | O O O O O O O O O O    |                                   | _____               | O O O O O O O O O O |
|                                                                                                                 | Frutta secca ed ess. _____  | O O O O O O O O O O    |                                   | _____               | O O O O O O O O O O |
|                                                                                                                 | Tostato _____               | O O O O O O O O O O    |                                   | _____               | O O O O O O O O O O |
|                                                                                                                 | Speziato _____              | O O O O O O O O O O    |                                   | _____               | O O O O O O O O O O |
|                                                                                                                 | Empireumatico _____         | O O O O O O O O O O    |                                   | _____               | O O O O O O O O O O |
|                                                                                                                 | Biochimici diversi _____    | O O O O O O O O O O    |                                   | _____               | O O O O O O O O O O |
|                                                                                                                 | Gli od positivi _____       | O O O O O O O O O O    |                                   | _____               | O O O O O O O O O O |
|                                                                                                                 | Gli od negativi _____       | O O O O O O O O O O    |                                   | _____               | O O O O O O O O O O |
|                                                                                                                 | ■ PIACEVOLEZZA R.O.         | O O O O O O O O O O    |                                   | _____               | O O O O O O O O O O |
| <b>Valutazione complessiva</b>                                                                                  | ■ LIVELLO EDONICO           | O O O O O O O O O O    |                                   | _____               | O O O O O O O O O O |
