# Supplementary material for: Metabolomics Combined with Sensory Analysis Reveals the Impact of Different Extraction Methods on Coffee Beverages from Coffea arabica and Coffea canephora var. Robusta
Source: Foods. 2022 Mar 11;11(6):807. doi: 10.3390/foods11060807 (PMC8953325; doi:10.3390/foods11060807)
Supplement: Supplementary file 1 [file foods-11-00807-s001.zip › Supplementary file S1.xlsx]

## Sheet: dataset metabolomics
Compound	sample3_1-r001	sample3_1-r002	sample3_2-r001	sample3_2-r002	sample5_1-r001	sample5_1-r002	sample5_2-r001	sample5_2-r002	sample8_1-r001	sample8_1-r002	sample8_2-r001	sample8_2-r002	sample4_1-r001	sample4_1-r002	sample4_2-r001	sample4_2-r002	sample10_1-r001	sample10_1-r002	sample10_2-r001	sample10_2-r002	sample12_1-r001	sample12_1-r002	sample12_2-r001	sample12_2-r002	sample14_1-r001	sample14_1-r002	sample14_1-r003	sample14_1-r004	sample1_1-r001	sample1_1-r002	sample1_2-r001	sample1_2-r002	sample6_1-r001	sample6_1-r002	sample6_2-r001	sample6_2-r002	sample2_1-r001	sample2_1-r002	sample2_2-r001	sample2_2-r002	sample11_1-r001	sample11_1-r002	sample11_2-r001	sample11_2-r002	sample13_1-r001	sample13_1-r002	sample13_2-r001	sample13_2-r002	sample15_1-r001
2-Ethyl-4,5-dimethyloxazole	1771428	1470276	1586700	1334389	1842590	1647850	1605544	1600152	1623358	2059375	1244665	1527824	1160930	1231466	1128529	1139689	895808	940401	1031753	1016540	1002793	1048601	1078876	1100148	1	687629	1661301	659813	1766186	1478524	1427166	1342008	1310553	1248987	1261111	1202548	1	1	581523	750241	969881	929512	907925	900412	1	711613	711540	709579	1367016
6-Acetyl-2,3,4,5-tetrahydropyridine	1718425	1645678	1586700	1298537	1842590	1647850	1605544	1600152	1623358	1536242	1274543	1527824	999457	1053859	1128529	1139689	1105977	940401	1031753	1016540	1002793	1048601	1078876	1100148	1	687629	1661301	659813	1766186	1478524	1427166	1342008	1310553	1248987	1261111	1202548	1	494144	760892	859008	969881	766508	907925	703130	1	711613	711540	709579	1367016
4-Ethyl-2,5-dimethyloxazole	1771428	1470276	1586700	1298537	1842590	1647850	1605544	1600152	1623358	1536242	1274543	1527824	999457	1053859	1128529	1139689	1105977	940401	1031753	1016540	1002793	1048601	1078876	1100148	1	687629	1661301	659813	1766186	1478524	1427166	1342008	1310553	1248987	1261111	1202548	1	494144	760892	750241	969881	766508	907925	900412	1	711613	711540	709579	1367016
5-Methyl-2-propyloxazole	1771428	1470276	1586700	1298537	1842590	1647850	1605544	1600152	1623358	1536242	1274543	1527824	999457	1053859	1128529	1139689	1105977	940401	1031753	1016540	1002793	1048601	1078876	1100148	1	687629	1661301	659813	1766186	1478524	1427166	1342008	1310553	1248987	1261111	1202548	1	494144	760892	750241	969881	766508	907925	900412	1	711613	711540	709579	1367016
5-Ethyl-2,4-dimethyloxazole	1771428	1470276	1586700	1298537	1842590	1647850	1605544	1600152	1623358	1536242	1274543	1527824	999457	1053859	1128529	1139689	1105977	940401	1031753	1016540	1002793	1048601	1078876	1100148	1	687629	1661301	659813	1766186	1478524	1427166	1342008	1310553	1248987	1261111	1202548	1	494144	760892	750241	969881	766508	907925	900412	1	711613	711540	709579	1367016
3-Ethyl-pyridine	1740171	1541497	1438051	1420764	1626420	1469890	1429407	1435134	1424817	1356916	1364276	1349524	933767	988574	1056155	1073989	824571	861057	917699	1169142	936021	982132	1006963	1035277	1939362	1656196	1561949	1566459	1661695	1373079	1334575	1027197	926148	841200	917086	829821	1	1	856666	847435	867865	710787	887488	1102509	1	711613	718587	709579	1242263
3-Ethylpyridine	1740171	1541497	1438051	1420764	1626420	1469890	1429407	1435134	1424817	1356916	1364276	1349524	933767	988574	1056155	1073989	824571	861057	917699	956833	936021	982132	1006963	1035277	1939362	1656196	1561949	1566459	1661695	1373079	1334575	1027197	907261	841200	917086	885173	1	1	856666	1	867865	710787	887488	880328	1	711613	718587	709579	1242263
Ethylpyrazine	361035	342733	307379	304015	332674	303896	306159	304812	297684	289770	295514	1	1	1	1	1	1	1	1	1	1	1	1	1	320195	295027	291280	282722	563379	469756	460728	440936	378627	370272	375393	379060	1	1	1	1	1	1	1	1	1	1	1	1	366977
2-Ethylpyrazine	361035	342733	307379	304015	332674	303896	306159	304812	297684	289770	295514	1	1	1	1	1	1	1	1	1	1	1	1	1	320195	295027	291280	282722	563379	469756	460728	440936	378627	370272	375393	379060	1	1	1	1	1	1	1	1	1	1	1	1	366977
2,5-Dimethylpyrazine	361035	342733	307379	304015	332674	303896	306159	304812	297684	289770	295514	1	1	1	1	1	1	1	1	1	1	1	1	1	320195	295027	291280	282722	563379	469756	460728	440936	378627	370272	375393	379060	1	1	1	1	1	1	1	1	1	1	1	1	366977
2,6-Dimethylpyrazine	361035	342733	307379	304015	332674	303896	306159	304812	297684	289770	295514	1	1	1	1	1	1	1	1	1	1	1	1	1	320195	295027	291280	282722	563379	469756	460728	440936	378627	370272	375393	379060	1	1	1	1	1	1	1	1	1	1	1	1	366977
Dimethylpyrazine	361035	342733	307379	304015	332674	303896	306159	304812	297684	289770	295514	1	1	1	1	1	1	1	1	1	1	1	1	1	320195	295027	291280	282722	563379	469756	460728	440936	378627	370272	375393	379060	1	1	1	1	1	1	1	1	1	1	1	1	366977
2,3-Dimethylpyrazine	361035	342733	307379	304015	332674	303896	306159	304812	297684	289770	295514	1	1	1	1	1	1	1	1	1	1	1	1	1	320195	295027	291280	282722	563379	469756	460728	440936	378627	370272	375393	379060	1	1	1	1	1	1	1	1	1	1	1	1	366977
3-Methylcatechol	120538	107118	107114	106900	107937	106027	106938	103009	113804	103944	110208	114110	1	1	1	1	1	1	1	1	1	1	1	1	1	1	1	1	1	1	1	1	1	1	1	1	1	1	1	1	1	1	1	1	1	1	1	1	1
Guaiacol	120538	107118	107114	106900	107937	106027	106938	103009	113804	103944	110208	114110	1	1	1	1	1	1	1	1	1	1	1	1	1	1	1	1	1	1	1	1	1	1	1	1	1	1	1	1	1	1	1	1	1	1	1	1	1
1-(2-Furanyl)-2-propanone	120538	107118	107114	106900	107937	106027	106938	103009	113804	103944	110208	114110	1	1	1	1	1	1	1	1	1	1	1	1	1	1	1	1	1	1	1	1	1	1	1	1	1	1	1	1	1	1	1	1	1	1	1	1	1
4-Methylcatechol	120538	107118	107114	106900	107937	106027	106938	103009	113804	103944	110208	114110	1	1	1	1	1	1	1	1	1	1	1	1	1	1	1	1	1	1	1	1	1	1	1	1	1	1	1	1	1	1	1	1	1	1	1	1	1
2-Acetyl-5-methylfuran	120538	107118	158414	106900	107937	106027	152351	103009	161441	156921	157833	114110	1	1	1	1	1	1	1	1	1	1	1	1	1	1	1	1	1	1	1	1	1	1	1	1	1	1	1	1	1	1	1	1	1	1	1	1	1
2-Acetylpyrrole	3722276	3571891	3387867	3377622	3655035	3318377	3196477	3285695	3192598	3124184	3199574	3198491	4564728	4745169	4319452	4474045	4572587	4771679	5035169	5176735	4834927	5095777	5287816	5251482	12252380	10570643	10130311	10006876	4704048	4021544	3703446	3889314	3412637	3534698	3396228	3396848	1903669	2190482	5014785	5069126	6361330	6367987	6150374	6130783	5452975	5477487	5391371	5435068	10773564
1-Methyl-2-carboxaldehyde pyrrole	3722276	3571891	3387867	3377622	3655035	3318377	3196477	3285695	3192598	3124184	3199574	3198491	4573942	4757918	4319452	4474045	4572587	4771679	5035169	5176735	4825408	5087001	5287816	5251482	12252380	10570643	7964480	10006876	4704048	4021544	3703446	3889314	3412637	3534698	3396228	3396848	1903669	2190482	5000529	5053652	6361330	6348814	6135823	6114772	5452975	5477487	5391371	5435068	10773564
L-Homoserine	4682010	4261937	3938266	3951685	4494594	4168114	4094916	4044574	4251289	4074869	4109343	4053585	1747974	1774214	1611563	1639892	1759692	1859606	1943717	1946944	1913445	2041750	2109533	2171584	4195951	3597058	3491159	3505767	4504650	3826038	3671649	3537919	2890791	2920665	3297602	3058917	859914	932138	1470011	1463548	2389204	2343469	2326440	2303261	1551213	1548991	1593686	1548119	2754274
1-Phenyl-1-propanone	876631	792098	806888	792234	669475	621014	799543	787713	826143	781177	795776	782893	1	1	1	1	1	1	1	1	1	1	1	1	663963	561514	565013	560868	863067	725201	894510	891985	779702	764330	776168	754101	1	1	1	1	1	1	1	1	1	1	1	1	576514
2-Methyl-5-vinylpyrazine	1	1	1	1	1	1	1	1	1	1	1	1	1	1	1	1	1	1	1	1	1	1	1	1	141326	120042	122735	111931	236056	1	215159	1	1	1	1	1	1	1	1	1	1	1	1	1	1	1	1	1	190208
(1-Methylethenyl)pyrazine	1	1	1	1	1	1	1	1	1	1	1	1	1	1	1	1	1	1	1	1	1	1	1	1	141326	120042	122735	111931	236056	1	215159	1	1	1	1	1	1	1	1	1	1	1	1	1	1	1	1	1	190208
1-Propenylpyrazine	1	1	1	1	1	1	1	1	1	1	1	1	1	1	1	1	1	1	1	1	1	1	1	1	141326	120042	122735	111931	236056	1	215159	1	1	1	1	1	1	1	1	1	1	1	1	1	1	1	1	1	190208
3-Mercapto-3-methyl-1-butanol	230104	206458	101923	194618	223233	200657	197229	202274	207501	198048	204287	204606	1	1	1	1	1	1	1	84432	83302	90443	93354	102203	203310	177033	170607	175375	207627	152252	171467	166086	137257	132015	156069	140341	1	1	1	1	109904	96583	94372	101651	1	1	1	1	135147
4-(Methylthio)-1-butanol	230104	206458	101923	194618	223233	200657	197229	202274	207501	198048	204287	204606	1	1	1	1	1	1	1	84432	83302	90443	93354	102203	203310	177033	170607	175375	207627	152252	171467	166086	137257	132015	156069	140341	1	1	1	1	109904	96583	94372	101651	1	1	1	1	135147
2-Methylbenzaldehyde	230104	206458	193975	194618	223233	200657	197229	202274	207501	198048	204287	204606	1	1	1	1	1	1	1	84432	83302	90443	93354	102203	203310	177033	170607	175375	218649	163710	179843	166086	137257	132015	156069	140341	1	1	1	1	109904	96583	94372	93337	1	1	1	1	135147
4-Methylbenzaldehyde	230104	206458	193975	194618	223233	200657	197229	202274	207501	198048	204287	204606	1	1	1	1	1	1	1	84432	83302	90443	93354	102203	203310	177033	170607	175375	218649	163710	179843	166086	137257	132015	156069	140341	1	1	1	1	109904	96583	94372	93337	1	1	1	1	135147
3-Methylbenzaldehyde	230104	206458	193975	194618	223233	200657	197229	202274	207501	198048	204287	204606	1	1	1	1	1	1	1	84432	83302	90443	93354	102203	203310	177033	170607	175375	218649	163710	179843	166086	137257	132015	156069	140341	1	1	1	1	109904	96583	94372	93337	1	1	1	1	135147
Phenylacetaldehyde	230104	206458	193975	194618	223233	200657	197229	202274	207501	198048	204287	204606	1	1	1	1	1	1	1	84432	83302	90443	93354	102203	203310	177033	170607	175375	218649	163710	179843	166086	137257	132015	156069	140341	1	1	1	1	109904	96583	94372	93337	1	1	1	1	135147
4-Vinylphenol	230104	206458	193975	194618	223233	200657	197229	202274	207501	198048	204287	204606	1	1	1	1	1	1	1	84432	83302	90443	93354	102203	203310	177033	170607	175375	218649	163710	179843	166086	137257	132015	156069	140341	1	1	1	1	109904	96583	94372	93337	1	1	1	1	135147
2-Ethyl-5-methylpyridine	10161765	9302234	8531616	8520306	9476849	8797773	8715980	8533476	8778970	8473735	8406486	8367909	3788892	3895642	3354414	3416411	3230341	3368612	3567904	3567879	3618899	3796107	3886713	3950787	10800661	9381301	9176600	9104181	1	1	1	1	5764258	5649339	5853116	5732151	1105864	1219137	1	1	1	1	1	1	2124626	2173881	2191457	2159863	1
2-Ethyl-5-methylpyrazine	1	1	1	1	1	1	1	1	1	1	1	1	1	1	1	1	1	1	1	1	1	1	1	1	1	1	1	1	209027	188548	194401	191527	1	1	1	1	1	1	1	1	1	1	1	1	1	1	1	1	213039
2-Ethyl-6-methylpyrazine	1	1	1	1	1	1	1	1	1	1	1	1	1	1	1	1	1	1	1	1	1	1	1	1	1	1	1	1	209027	188548	194401	191527	1	1	1	1	1	1	1	1	1	1	1	1	1	1	1	1	213039
Propylpyrazine	1	1	1	1	1	1	1	1	1	1	1	1	1	1	1	1	1	1	1	1	1	1	1	1	1	1	1	1	84403	188548	194401	191527	1	535288	1	1	1	1	1	1	1	1	1	1	1	1	1	1	213039
Trimethylpyrazine	1	1	1	1	1	1	1	1	1	1	1	1	1	1	1	1	1	1	1	1	1	1	1	1	1	1	1	1	84403	188548	194401	191527	1	535288	1	1	1	1	1	1	1	1	1	1	1	1	1	1	213039
2-Ethyl-5-methylpyrazine, 9CI, 8CI	1	1	1	1	1	1	1	1	1	1	1	1	1	1	1	1	1	1	1	1	1	1	1	1	1	1	1	1	209027	188548	194401	191527	1	535288	1	1	1	1	1	1	1	1	1	1	1	1	1	1	213039
2,3,trimethylpyrazine	1	1	1	1	1	1	1	1	1	1	1	1	1	1	1	1	1	1	1	1	1	1	1	1	1	1	1	1	209027	188548	194401	191527	1	535288	1	1	1	1	1	1	1	1	1	1	1	1	1	1	213039
2-Propylpyrazine	1	1	1	1	1	1	1	1	1	1	1	1	1	1	1	1	1	1	1	1	1	1	1	1	1	1	1	1	209027	188548	194401	191527	1	535288	1	1	1	1	1	1	1	1	1	1	1	1	1	1	213039
2-Ethyl-3-methylpyrazine	1	1	1	1	1	1	1	1	1	1	1	1	1	1	1	1	1	1	1	1	1	1	1	1	1	1	1	1	209027	188548	194401	191527	1	535288	1	1	1	1	1	1	1	1	1	1	1	1	1	1	213039
2-[(Ethylthio)methyl]furan	1	1	1	1	1	1	1	1	1	1	1	1	1	1	1	1	1	1	1	1	1	1	1	1	4125240	3536688	3445612	1	1	1	1	1	1	1	1	1	1	1	1	1	1	1	1	1	1489515	1484930	1532276	1490116	1
Methyl phenyl sulfide	1	1	1	1	1	1	1	1	1	1	1	1	1	1	1	1	1	1	1	1	1	1	1	1	4125240	3536688	3445612	1	1	1	1	1	1	1	1	1	1	1	1	1	1	1	1	1	1489515	1484930	1532276	1490116	1
2,5-Dimethyl-3-(methylthio)furan	1	1	1	1	1	1	1	1	1	1	1	1	1	1	1	1	1	1	1	1	1	1	1	1	4125240	3536688	3445612	1	1	1	1	1	1	1	1	1	1	1	1	1	1	1	1	1	1479880	1484930	1532276	1490116	1
3,5-Dimethyl-1,2-cyclopentanedione	285393	284041	253381	263030	273313	260904	257426	245951	269070	248155	262410	257886	1	1	1	1	1	1	1	1	1	1	1	1	219992	201380	203342	201912	213718	188296	179238	170776	168366	170833	169753	172571	1	1	1	1	1	1	1	1	1	1	1	1	137922
3-Ethyl-1,2-cyclopentanedione	285393	284041	253381	263030	273313	260904	257426	245951	269070	248155	262410	257886	1	1	1	1	1	1	1	1	1	1	1	1	219992	201380	203342	201912	213718	188296	179238	170776	168366	170833	169753	172571	1	1	1	1	1	1	1	1	1	1	1	1	137922
3,4-Dimethyl-1,2-cyclopentanedione	285393	284041	253381	263030	273313	260904	257426	245951	269070	248155	262410	257886	1	1	1	1	1	1	1	1	1	1	1	1	219992	201380	203342	201912	213718	188296	179238	170776	168366	170833	169753	172571	1	1	1	1	1	1	1	1	1	1	1	1	137922
3-Methyl-1,2-cyclohexanedione	285393	284041	253381	263030	273313	260904	257426	245951	269070	248155	262410	257886	1	1	1	1	1	1	1	1	1	1	1	1	219992	201380	203342	201912	213718	188296	179238	170776	168366	170833	169753	172571	1	1	1	1	1	1	1	1	1	1	1	1	137922
Methional	3275453	3022403	1	1	3168601	1	1	1	1	1	1	1	1	1	1	1	1	1	1	1	1	1	2862607	1	4139720	3516506	3412301	3402721	2744342	1	1	1	1	1	1	1	1	1	1	2324708	1	1	1	1	1902129	1878262	1941021	1902916	1
Coumarin	1	1	1	1	1	1	1	1	1	1	1	1	391136	398061	369706	375807	305650	322185	340253	324297	356242	381202	397166	398307	574791	494703	469167	475947	1	1	1	1	1	1	1	1	200453	236847	1	1	1	1	1	1	1	1	1	1	1
2-[(Methylthio)methyl]-2-butenal	1687112	1520509	1574573	1531215	1754111	1597727	1564665	1515617	1558699	1490655	1473820	1	1423323	1447348	1359565	1361556	1381981	1	1534710	1584115	1576742	1612547	1699453	1740629	1819050	1488555	1470403	1435649	2375098	1705237	1700410	1637392	1	1	1349418	1237339	907372	970989	1397369	1386004	1854662	1696819	1668318	1661835	1420050	1440565	1477764	1460759	1
5-Ethyl-2-methyloxazole	375369	342675	297642	320069	348364	308688	312064	300443	311892	299770	291354	295807	1	1	1	1	1	1	1	1	1	1	1	1	734378	663921	622786	617830	413490	328913	367382	364091	1	1	327285	325870	1	1	1	1	1	1	1	1	1	1	1	1	552982
5-Ethyl-4-methyloxazole	375369	342675	297642	320069	348364	308688	312064	300443	311892	299770	291354	295807	1	1	1	1	1	1	1	1	1	1	1	1	734378	663921	622786	617830	413490	328913	367382	364091	1	1	327285	325870	1	1	1	1	1	1	1	1	1	1	1	1	552982
2-Acetyl-1-pyrroline	375369	342675	297642	320069	348364	308688	312064	300443	311892	299770	291354	295807	1	1	1	1	1	1	1	1	1	1	1	1	734378	663921	622786	617830	413490	328913	367382	364091	1	1	327285	325870	1	1	1	1	1	1	1	1	1	1	1	1	576533
4-Ethyl-2-methyloxazole	375369	342675	297642	320069	348364	308688	312064	300443	311892	299770	291354	295807	1	1	1	1	1	1	1	1	1	1	1	1	734378	663921	622786	617830	413490	328913	367382	364091	1	1	327285	325870	1	1	1	1	1	1	1	1	1	1	1	1	552982
2-Ethyl-5-methyloxazole	375369	342675	297642	320069	348364	308688	312064	300443	311892	299770	291354	295807	1	1	1	1	1	1	1	1	1	1	1	1	734378	663921	622786	617830	413490	328913	367382	364091	1	1	327285	325870	1	1	1	1	1	1	1	1	1	1	1	1	552982
2-Ethyl-4-methyloxazole	375369	342675	297642	320069	348364	308688	312064	300443	311892	299770	291354	295807	1	1	1	1	1	1	1	1	1	1	1	1	734378	663921	622786	617830	413490	328913	367382	364091	1	1	327285	325870	1	1	1	1	1	1	1	1	1	1	1	1	552982
2-Isopropyl-6-methoxypyrazine	1016369	974103	892474	897743	962131	918528	917404	887043	927310	864715	860967	898334	1	1	1	1	1	1	1	1	1	1	1	1	1131120	1012140	1	987290	892292	799010	285879	283004	1028116	932825	939041	926243	1	1	267275	268837	478090	424140	479761	452159	266612	260372	1	280841	1248452
2-Isopropyl-5-methoxypyrazine	1016369	974103	892474	897743	962131	918528	917404	887043	927310	864715	860967	898334	1	1	1	1	1	1	1	1	1	1	1	1	1131120	1012140	1	987290	892292	799010	285879	283004	1028116	932825	939041	926243	1	1	267275	268837	478090	424140	479761	452159	266612	260372	1	280841	1248452
2,5-Diethylpyrazine	133089	1	1	1	1	1	1	1	1	1	1	1	1	1	1	1	1	1	1	1	1	1	1	1	211719	191253	179457	179547	224748	194285	214486	206014	309364	193220	203535	322376	1	1	1	1	1	1	1	1	1	1	1	1	186103
2,6-Diethylpyrazine	133089	1	1	1	1	1	1	1	1	1	1	1	1	1	1	1	1	1	1	1	1	1	1	1	211719	191253	179457	179547	224748	194285	371913	348437	309364	193220	309294	322376	1	1	1	1	1	1	1	1	1	1	1	1	508382
2-Ethyl-3,5-dimethylpyrazine	133089	1	1	1	1	1	1	1	1	1	1	1	1	1	1	1	1	1	1	1	1	1	1	1	415463	191253	340437	179547	356995	194285	371913	348437	309364	193220	309294	322376	1	1	1	1	1	1	1	1	1	1	1	1	508382
Tetramethylpyrazine	133089	1	1	1	1	1	1	1	1	1	1	1	1	1	1	1	1	1	1	1	1	1	1	1	211719	368991	340437	179547	224748	307395	371913	325385	309364	319101	309294	322376	1	1	1	1	1	1	1	1	1	1	1	1	508382
3-Ethyl-2,5-dimethylpyrazine	133089	1	1	1	1	1	1	1	1	1	1	1	1	1	1	1	1	1	1	1	1	1	1	1	211719	191253	340437	341829	224748	307395	371913	348437	309364	319101	309294	322376	1	1	1	1	1	1	1	1	1	1	1	1	575654
2-Ethyl-3,6-dimethylpyrazine	133089	1	1	1	1	1	1	1	1	1	1	1	1	1	1	1	1	1	1	1	1	1	1	1	415463	191253	340437	341829	356995	307395	371913	348437	309364	319101	309294	322376	1	1	1	1	1	1	1	1	1	1	1	1	575654
2-Methyl-5-propylpyrazine	133089	1	1	1	1	1	1	1	1	1	1	1	1	1	1	1	1	1	1	1	1	1	1	1	415463	191253	340437	341829	356995	307395	371913	348437	309364	319101	309294	322376	1	1	1	1	1	1	1	1	1	1	1	1	575654
2-Isopropyl-5-methylpyrazine	133089	1	1	1	1	1	1	1	1	1	1	1	1	1	1	1	1	1	1	1	1	1	1	1	415463	368991	340437	341829	378876	307395	371913	348437	309364	319101	309294	322376	1	1	1	1	1	1	1	1	1	1	1	1	575654
Tyrosol	353683	330280	331170	327936	349804	318721	326276	313246	325288	314333	319971	326189	248701	261956	230445	246154	259371	269102	283126	283337	276875	278236	300010	293198	306911	286026	283238	289196	489772	445729	426950	409619	391657	383850	387589	369681	1	1	1	1	420946	404888	409439	395305	1	1	347962	346929	353853
4-Ethyl-1,2-benzenediol	353683	330280	331170	327936	349804	318721	326276	313246	325288	314333	319971	326189	248701	261956	230445	246154	259371	269102	283126	283337	276875	278236	300010	293198	306911	286026	283238	289196	489772	445729	426950	409619	391657	383850	387589	369681	1	1	1	1	420946	404888	409439	395305	1	1	347962	346929	353853
3-Ethyl-1,2-benzenediol	353683	330280	331170	327936	349804	318721	326276	313246	325288	314333	319971	326189	248701	261956	230445	246154	259371	269102	283126	283337	276875	278236	300010	293198	306911	286026	283238	289196	489772	445729	426950	409619	391657	383850	387589	369681	1	1	1	1	420946	404888	409439	395305	1	1	347962	346929	353853
4-Ethylcatechol	353683	330280	331170	327936	349804	318721	326276	313246	325288	314333	319971	326189	248701	261956	230445	246154	259371	269102	283126	283337	276875	278236	300010	293198	306911	286026	283238	289196	489772	445729	426950	409619	391657	383850	387589	369681	1	1	1	1	420946	404888	409439	395305	1	1	347962	346929	353853
1-(2-Furanyl)-1-butanone	353683	330280	331170	327936	349804	318721	326276	313246	325288	314333	319971	326189	248701	261956	230445	246154	259371	269102	283126	283337	276875	278236	300010	293198	306911	286026	283238	289196	489772	445729	426950	409619	391657	383850	387589	369681	1	1	1	1	420946	404888	409439	395305	1	1	347962	346929	353853
2-Acetyl-5-methylthiophene	1	1	1	1	1	1	1	1	1	1	1	1	1	1	1	1	1	1	1	1	1	1	1	1	227924	205951	184768	1	1	1	1	457161	1	1	1	1	1	1	1	1	1	1	1	1	1	1	1	1	1
2-(Methylthio)phenol	1	1	1	1	1	1	1	1	1	1	1	1	1	1	1	1	1	1	1	1	1	1	1	1	227924	205951	184768	1	1	1	1	457161	1	1	1	1	1	1	1	1	1	1	1	1	1	1	1	1	1
Kahweofuran	1	1	1	1	1	1	1	1	1	1	1	1	1	1	1	1	1	1	1	1	1	1	1	1	227924	205951	184768	1	1	1	1	457161	1	1	1	1	1	1	1	1	1	1	1	1	1	1	1	1	1
5-Acetyl-2,4-dimethyloxazole	1127207	1008919	976429	974686	709238	2036201	987084	644863	1064906	632254	999164	958202	1	1	1	259922	926570	1020242	1	1	1	1	1	1071800	711268	930845	883178	915745	1508699	1292165	560818	1158270	2109753	2061976	2024692	2039297	809762	893603	1091412	1085805	1296733	1287253	1189440	1244969	1094889	1112062	1132474	1114898	533330
Furfuryl acetate	4673280	4431851	1	4531471	1	4491237	4479604	1	4547445	4380544	4419925	937930	691272	4145737	3845637	3903534	1	3969109	4135155	4070182	3916610	4083074	722556	4199110	3979212	3755176	3766543	3705849	4522290	5514289	5205174	5137006	4882571	4872158	4776690	4693333	3262314	3507666	5026809	4946656	5392071	5289159	5301000	5123833	4774033	3964088	4777956	4729121	4168287
2,5-Diethylthiazole	1	1	1	1	1	1	1	1	1	1	1	1	1	1	1	1	1	1	1	1	1	1	1	1	292753	274479	260799	262271	1	1	1	1	1	1	1	1	1	1	1	1	1	1	1	1	1	1	1	1	257150
4-Ethyl-2,5-dimethylthiazole	1	1	1	1	1	1	1	1	1	1	1	1	1	1	1	1	1	1	1	1	1	1	1	1	292753	274479	260799	262271	1	1	1	1	1	1	1	1	1	1	1	1	1	1	1	1	1	1	1	1	257150
2-Isobutylthiazole	1	1	1	1	1	1	1	1	1	1	1	1	1	1	1	1	1	1	1	1	1	1	1	1	292753	274479	260799	262271	1	1	1	1	1	1	1	1	1	1	1	1	1	1	1	1	1	1	1	1	257150
2,4-Diethylthiazole	1	1	1	1	1	1	1	1	1	1	1	1	1	1	1	1	1	1	1	1	1	1	1	1	292753	274479	260799	262271	1	1	1	1	1	1	1	1	1	1	1	1	1	1	1	1	1	1	1	1	257150
5-Ethyl-2,4-dimethylthiazole	1	1	1	1	1	1	1	1	1	1	1	1	1	1	1	1	1	1	1	1	1	1	1	1	292753	274479	260799	262271	1	1	1	1	1	1	1	1	1	1	1	1	1	1	1	1	1	1	1	1	257150
2-Ethyl-4,5-dimethylthiazole	1	1	1	1	1	1	1	1	1	1	1	1	1	1	1	1	1	1	1	1	1	1	1	1	292753	274479	260799	262271	1	1	1	1	1	1	1	1	1	1	1	1	1	1	1	1	1	1	1	1	257150
2-Isopropyl-4-methylthiazole	1	1	1	1	1	1	1	1	1	1	1	1	1	1	1	1	1	1	1	1	1	1	1	1	292753	274479	260799	262271	1	1	1	1	1	1	1	1	1	1	1	1	1	1	1	1	1	1	1	1	257150
5-Methylquinoxaline	200488	201577	172778	167367	178025	177091	173016	164164	216186	206047	191845	197743	1	1	1	1	1	1	1	1	1	1	1	1	292655	267143	254320	244872	157586	123060	137178	137775	135337	136696	155292	153286	1	1	1	1	1	1	1	1	1	1	1	1	168149
m-Coumaric acid	545475	506562	251869	237795	263202	242120	240086	230380	494090	219632	221765	243569	1	1	1	1	1	1	1	1	1	1	1	1	193006	166543	177543	182216	1	1	1	1	1	1	1	1	1	1	1	1	1	1	1	1	1	1	1	1	1
p-Coumaric acid	545475	506562	251869	237795	263202	242120	240086	230380	494090	219632	221765	243569	1	1	1	1	1	1	1	1	1	1	1	1	193006	166543	177543	182216	1	1	1	1	1	1	1	1	1	1	1	1	1	1	1	1	1	1	1	1	1
o-Coumaric acid	545475	506562	251869	237795	263202	242120	240086	230380	494090	219632	221765	243569	1	1	1	1	1	1	1	1	1	1	1	1	193006	166543	177543	182216	1	1	1	1	1	1	1	1	1	1	1	1	1	1	1	1	1	1	1	1	1
N-furfurylpyrrole	1	1	1	1	1	1	1	1	1	1	1	1	1	1	1	1	1	1	1	1	1	1	1	1	1	1	554151	529887	225376	213364	220623	217194	223913	222970	219414	217566	1	1	1	1	1	1	1	1	1	1	1	1	531213
1-Furfurylpyrrole	1	1	1	1	1	1	1	1	1	1	1	1	1	1	1	1	1	1	1	1	1	1	1	1	1	1	554151	529887	225376	213364	220623	217194	223913	222970	219414	217566	1	1	1	1	1	1	1	1	1	1	1	1	531213
1-(2-Furanylmethyl)-1H-pyrrole	1	1	1	1	1	1	1	1	1	1	1	1	1	1	1	1	1	1	1	1	1	1	1	1	1	1	554151	529887	225376	213364	220623	1	223913	222970	219414	217566	1	1	1	1	1	1	1	1	1	1	1	1	531213
3-Mercapto-3-methylbutyl formate	1463464	1327253	1431338	1386043	1569924	1447693	1426220	1366555	1413006	1349847	1342883	1337664	1423323	1447348	1359565	1361556	1381981	1	1	1584115	1576742	1612547	1687467	1728729	1704766	1426121	1408641	1374539	2121723	1488319	1482297	1436377	1036490	1024193	1	1067254	907372	970989	1397369	1386004	1802191	1652903	1618666	1613456	1407219	1422231	1465648	1442722	1
2-Acetyl-3,6-dimethylpyrazine	1396148	1315157	1193537	1189267	1306013	1214482	1209245	1213898	1195898	1125358	1132723	1115605	563145	595322	496702	491394	682176	717772	755468	744976	501559	528220	534313	549001	2365629	2148191	2061711	2063060	1865396	1602773	1823018	1780145	1663809	1618812	1618184	1551975	1	1	706544	692970	1071546	1081050	1083135	1054380	752783	773379	772801	750289	2554116
2-Acetyl-3,5-dimethylpyrazine	1396148	1315157	1193537	1189267	1306013	1214482	1209245	1213898	1195898	1125358	1132723	1115605	563145	595322	496702	491394	682176	717772	755468	744976	501559	528220	534313	549001	2365629	2148191	2061711	2063060	1865396	1602773	1823018	1780145	1663809	1618812	1618184	1551975	1	1	706544	692970	1071546	1081050	1083135	1054380	752783	773379	772801	750289	2554116
2-Methyl-3-(2-methylpropyl)pyrazine	1	1	1	1	1	1	1	1	1	1	1	1	1	1	1	1	1	1	1	1	1	1	1	1	321229	267075	262290	248401	172395	137545	137181	164196	113162	111241	108837	1	1	1	1	1	1	1	1	1	1	1	1	1	448369
Ethyl acetoacetate	147392	1	1	1	1	156238	1	1	1	1	89946	90465	1	1	1	1	1	1	1	1	1	1	1	1	191365	1	1	1	258136	1	1	1	1	188554	179434	1	1	1	1	1	1	1	1	1	1	1	1	1	154438
3',4'-Dihydroxyacetophenone	221734	208816	223327	223444	232165	217845	220393	212266	227859	208663	290950	219639	207509	223034	198497	201045	197298	206695	215853	219223	248918	209503	213496	217577	190542	177336	176703	174851	1	269702	253852	344961	329598	336203	327283	314753	176671	180634	263962	266197	352508	347557	355129	330821	245414	248005	307547	294757	188064
4-Hydroxyphenylacetic acid	221734	208816	223327	223444	232165	217845	220393	212266	227859	208663	216804	219639	207509	223034	198497	201045	197298	206695	215853	258739	248918	209503	213496	217577	190542	177336	176703	174851	1	269702	336350	261012	246374	253179	327283	229897	176671	180634	263962	319028	352508	347557	355129	330821	245414	248005	307547	294757	258850
Vanillin	221734	208816	223327	223444	232165	217845	220393	212266	227859	208663	216804	219639	207509	223034	198497	201045	197298	206695	215853	219223	206566	209503	213496	217577	190542	177336	176703	174851	1	269702	336350	261012	246374	253179	251312	229897	167270	180634	263962	266197	282133	274604	280629	261838	245414	248005	257223	244748	188064
1-(5-Methyl-2-furanyl)-1,2-propanedione	301343	208816	223327	223444	232165	217845	220316	212266	227859	208663	216804	219639	207509	223034	198497	201045	197298	206695	215853	219223	206566	209503	213496	217577	190542	177336	176703	174770	1	269702	253852	261012	246374	253179	251312	229897	167270	180634	263962	266197	282133	274604	280629	261838	245414	248005	257223	244748	188064
Ethyl 2-furanyl diketone	221734	208816	223327	223444	232165	217845	220393	212266	227859	208663	216804	219639	207509	223034	198497	201045	197298	206695	215853	219223	206566	209503	213496	217577	190542	177336	176703	174851	1	269702	253852	261012	246374	253179	251312	229897	167270	180634	263962	266197	282133	274604	280629	261838	245414	248005	257223	244748	188064
Biphenyl	1	1	1	1	359082	329956	312953	324714	338924	311227	312372	303966	1	1	1	1	1	1	1	1	1	1	1	1	1	1	1	1	1	482561	1	1	411497	414920	458198	433943	1	1	1	1	1	217444	1	1	1	1	1	1	435268
Gallic aldehyde	213975	193376	172643	184654	197518	185404	183880	174653	187768	186329	177848	182820	1	1	1	1	1	1	1	1	1	1	1	1	194888	177232	169050	162217	247738	213024	221732	207433	201676	204085	210480	210185	1	1	1	1	1	1	1	1	1	1	1	1	193932
2,4-Dihydroxybenzoic acid	213975	193376	172643	184654	197518	185404	183880	174653	187768	186329	177848	182820	1	1	1	1	1	1	1	1	1	1	1	1	194888	177232	169050	162217	247738	213024	221732	207433	201676	204085	210480	210185	1	1	1	1	1	1	1	1	1	1	1	1	193932
Protocatechuic acid	213975	193376	172643	184654	197518	185404	183880	174653	187768	186329	177848	182820	1	1	1	1	1	1	1	1	1	1	1	1	194888	177232	169050	162217	247738	213024	221732	207433	201676	204085	210480	210185	1	1	1	1	1	1	1	1	1	1	1	1	193932
3,5-Dihydroxybenzoic acid	213975	193376	172643	184654	197518	185404	183880	174653	187768	186329	177848	182820	1	1	1	1	1	1	1	1	1	1	1	1	194888	177232	169050	162217	247738	213024	221732	207433	201676	204085	210480	210185	1	1	1	1	1	1	1	1	1	1	1	1	193932
2,6-Dihydroxybenzoic acid	213975	193376	172643	184654	197518	185404	183880	174653	187768	186329	177848	182820	1	1	1	1	1	1	1	1	1	1	1	1	194888	177232	169050	162217	247738	213024	221732	207433	201676	204085	210480	210185	1	1	1	1	1	1	1	1	1	1	1	1	193932
2,3-Dihydroxybenzoic acid	213975	193376	172643	184654	197518	185404	183880	174653	187768	186329	177848	182820	1	1	1	1	1	1	1	1	1	1	1	1	194888	177232	169050	162217	247738	213024	221732	207433	201676	204085	210480	210185	1	1	1	1	1	1	1	1	1	1	1	1	193932
Gentisic acid	213975	193376	172643	184654	197518	185404	183880	174653	187768	186329	177848	182820	1	1	1	1	1	1	1	1	1	1	1	1	194888	177232	169050	162217	247738	213024	221732	207433	201676	204085	210480	210185	1	1	1	1	1	1	1	1	1	1	1	1	193932
2-Acetyl-6-methylpyridine	1233762	963823	886978	874493	934353	880110	947922	944161	873568	824189	829447	797933	396290	404647	342655	358847	449989	456230	484195	482404	409092	437060	440663	450426	1879034	1224862	1729952	1183943	1112088	864647	950708	920154	898689	890808	921655	850035	1	168841	349694	363219	548946	544717	571750	532913	397735	409543	403540	397738	1104685
2-Acetyl-5-methylpyridine	1233762	963823	886978	874493	934353	880110	947922	944161	873568	824189	829447	797933	396290	404647	342655	358847	449989	456230	484195	482404	409092	437060	440663	450426	1879034	1224862	1729952	1183943	1112088	864647	950708	920154	898689	890808	921655	850035	1	168841	349694	363219	548946	544717	571750	532913	397735	409543	403540	397738	1104685
4-Acetyl-3-methylpyridine	1233762	963823	887039	874493	934353	880110	884271	944161	873568	823908	820191	797933	396290	404647	342655	358847	445364	456230	484195	482404	409092	437060	440663	450426	1879034	1224862	1729952	1183943	1112088	864647	950708	920154	952419	895249	859382	850035	1	168841	349694	363219	545856	538142	559378	528348	392457	409543	403540	397738	1104685
4-Acetyl-2-methylpyridine	1233762	963823	887039	874493	934353	880110	884271	944161	873568	823908	820191	797933	396290	404647	342655	358847	445364	456230	484195	482404	409092	437060	440663	450426	1879034	1224862	1729952	1183943	1112088	864647	950708	920154	952419	895249	859382	850035	1	168841	349694	363219	545856	538142	559378	528348	392457	409543	403540	397738	1104685
4,5-Dimethyl-2-propyloxazole	10219378	9381241	8607612	8592172	9570115	8883752	8795689	8490667	8873816	8558864	8488144	8452669	3788892	3895642	3354414	3416411	3225222	3364050	3567904	3567879	3618899	3796107	3886713	3950787	475678	443984	437424	438331	1	1	1	1	5807454	5689651	5895734	5756781	1105864	1219137	1	1	1	1	1	1	2124626	2173881	2191457	2159863	6426444
Umbelliferone	4657512	1	4555180	1	994942	4491237	1	908673	1	1	4397451	937870	691272	4145737	3845637	3903534	1	3969109	4135155	4070182	3916610	4083074	722556	4199110	1	3750081	3766543	3705849	1251218	5514289	5205174	5137006	4882571	4872158	1	4693333	3262314	3507666	5026809	4946656	5392071	5289159	5301000	5123833	4774033	769752	4777956	4729121	1
Caffeic acid	4657512	1	4555180	1	994942	4491237	1	908673	1	1	4397451	937870	691272	4145737	3845637	3903534	1	3969109	4135155	4070182	3916610	4083074	722556	4199110	1	3750081	3766543	3705849	1251218	5514289	5205174	5137006	4882571	4872158	1	4693333	3262314	3507666	5026809	4946656	5392071	5289159	5301000	5123833	4774033	769752	4777956	4729121	1
trans-Caffeic acid	4657512	1	4555180	1	994942	4491237	1	908673	1	1	4397451	937870	691272	4145737	3845637	3903534	1	3969109	4135155	4070182	3916610	4083074	722556	4199110	1	3750081	3766543	3705849	1251218	5514289	5205174	5137006	4882571	4872158	1	4693333	3262314	3507666	5026809	4946656	5392071	5289159	5301000	5123833	4774033	769752	4777956	4729121	1
4-Hydroxycoumarin	4657512	1	4555180	1	994942	4491237	1	908673	1	1	4397451	937870	691272	4145737	3845637	3903534	1	3969109	4135155	4070182	3916610	4083074	722556	4199110	1	3750081	3766543	3705849	1251218	5514289	5205174	5137006	4882571	4872158	1	4693333	3262314	3507666	5026809	4946656	5392071	5289159	5301000	5123833	4774033	769752	4777956	4729121	1
Trigonelline	241703	228149	206637	223906	9297016	205556	201775	184374	8661519	215493	206901	288949	110426	118584	108131	105814	128259	130410	137216	134034	144226	144255	150805	154444	205010	195814	170065	182455	259193	10917948	205681	221691	11236092	10971941	214126	10689297	1	1	1	1	145683	153039	159411	150967	104975	1	103614	1	184697
Methyl nicotinate	241703	228149	206637	223906	9280135	205556	201775	184374	8661519	215493	206901	288949	110426	118584	108131	105814	128259	130410	137216	134034	144226	144255	150805	154444	205010	195814	170065	182455	259193	10917948	205681	221691	11236092	10971941	214126	10689297	1	1	1	1	145683	153039	159411	150967	104975	1	103614	1	184697
3-Isobutyl-2-methoxypyrazine	1	392645	1	1	396314	363038	369471	1	375933	1	1	1	1	1	1	1	1	1	1	1	1	1	1	1	1	1	1	1	1	1	1	1	1	1	1	1	1	1	1	1	1	1	1	1	1	1	1	1	1
Vanillic acid	313597	282129	259400	278582	337589	276483	244251	257400	256832	271455	228759	249982	263945	245812	254172	233320	212978	233242	224969	245656	266097	231452	264455	275706	432819	338125	365990	340879	302079	219908	224066	208082	192050	182916	172813	192083	1	1	218094	216614	181953	227753	208030	190384	1	185524	192797	1	273574
3,4-Dihydroxyphenylacetic acid	313597	282129	259400	278582	337589	276483	244251	257400	256832	271455	228759	249982	263945	245812	254172	233320	212978	233242	224969	245656	266097	231452	264455	275706	432819	338125	365990	340879	302079	219908	224066	208082	192050	182916	172813	192083	1	1	218094	216614	181953	227753	208030	190384	1	185524	192797	1	273574
2,3-Diethyl-5-methylpyrazine	1	1	1	1	1	1	1	1	1	1	1	1	1	1	1	1	1	1	1	1	1	1	1	1	299920	267075	262290	248401	133834	137545	137181	164196	113162	111241	108837	1	1	1	1	1	1	1	1	1	1	1	1	1	448369
3,5-Diethyl-2-methylpyrazine	1	1	1	1	1	1	1	1	1	1	1	1	1	1	1	1	1	1	1	1	1	1	1	1	299920	267075	262290	248401	133834	109498	137181	164196	113162	111241	108837	1	1	1	1	1	1	1	1	1	1	1	1	1	448369
2,5-Diethyl-3-methylpyrazine	1	1	1	1	1	1	1	1	1	1	1	1	1	1	1	1	1	1	1	1	1	1	1	1	299920	267075	216743	248401	133834	109498	137181	131156	96127	111241	108837	1	1	1	1	1	1	1	1	1	1	1	1	1	448369
2,5-Dimethyl-3-(methyldithio)furan	916041	769770	752893	789252	870568	757033	843792	779289	854208	766455	768899	769907	811811	834416	878915	893225	1	973415	909950	887384	791870	872418	619971	957724	1	1	1	1	1097319	867054	922452	652515	767917	737381	750259	847211	854447	943020	980659	943023	861098	810678	828863	1	1	1	609039	422817	681830
Thymol	1	1	1	1	1	1	1	1	1	1	1	1	1	1	1	1	1	1	1	1	1	1	1	1	1	1	1	1	353431	1	1	1	1	1	1	1	1	1	1	1	1	1	1	1	1	1	1	1	1
Carvacrol	1	1	1	1	1	1	1	1	1	1	1	1	1	1	1	1	1	1	1	1	1	1	1	1	1	1	1	1	353431	1	1	1	1	1	1	1	1	1	1	1	1	1	1	1	1	1	1	1	1
N6-formyl lysine	338739	320662	313304	317107	316306	305205	315241	317174	318084	302226	307717	321132	230694	239431	221834	223970	240291	239743	260646	253374	244024	246861	256352	253670	284433	270653	278480	271541	488384	454622	451872	434878	412373	426802	413446	409378	1	1	347751	1	1	406239	1	1	1	1	1	1	396245
Hydroxytyrosol	792934	751196	748444	737870	742152	745386	721807	712540	693892	687664	695542	693948	499163	511548	457474	463718	486088	477528	494727	505064	485480	509690	513004	518513	657967	633159	631558	619960	1946551	1230874	1189718	1168179	1063515	1087678	1089407	1076269	788801	819051	818144	834248	1514413	1454981	1502367	1418948	1298801	1283778	794449	1295398	1438732
Isoferulic acid	792934	751196	748444	737870	742152	745386	721807	712540	693892	687664	695542	693948	499163	511548	457474	463718	486088	477528	494727	505064	485480	509690	513004	518513	657967	633159	631558	619960	1321977	1	1189718	1168179	1063971	1088061	1089772	1076623	788801	819051	818144	834248	1514606	943377	1502367	1	790755	813476	1	823240	1439459
Ferulic acid	792934	751196	748444	737870	742152	745386	721807	712540	693892	687664	695542	693948	499163	511548	457474	463718	486088	477528	494727	505064	485480	509690	513004	518513	657967	633159	631558	619960	1321977	1	1189718	1168179	1063971	1088061	1089772	1076623	788801	819051	818144	834248	1514606	943377	1502367	1	790755	813476	1	823240	1439459
4-[(2-Furanylmethyl)thio]-2-pentanone	334197	313538	282733	285732	283478	273986	266899	279115	285345	288493	289927	275766	1	1	1	1	1	1	1	1	1	1	1	1	291792	265438	261160	253933	1	1	97932	1	1	1	1	1	1	1	1	1	1	1	1	1	1	1	1	1	1
Calystegine A6	1682920	1819551	1636357	562658	1555322	569064	1734270	1408528	1807180	544331	1735462	1742635	158893	152190	143406	330577	129751	203666	110567	138889	191957	138563	152090	226400	1552334	1348377	1345357	1339167	401787	340077	344751	328981	1589190	1598862	1620791	1561237	114787	154374	583892	182718	994831	1000283	1531005	256821	172266	173892	174963	171152	1369344
Dihydroactinidiolide	302199	276198	246633	240225	269170	252102	248107	249505	237639	233356	242331	230661	88565	90155	1	1	1	84707	80138	90768	94725	94739	96972	104202	260040	227256	216796	212919	133136	116863	145745	135852	134666	134343	139206	125089	1	1	111741	107838	183377	187643	188236	181036	119193	124719	131934	126328	205908
Sinapaldehyde	370136	347243	299345	314494	350901	313714	320460	333804	314528	292408	306174	301117	1	1	1	1	139365	153040	156631	151237	159493	161095	160668	162183	330169	290089	283194	289933	330174	293459	286553	261464	260928	267809	278752	262980	1	1	96747	98857	137417	127799	148926	117701	98741	1	1	104261	240241
Caffeic acid ethyl ester	370136	347243	299345	314494	350901	313714	320460	333804	314528	292408	306174	301117	1	1	1	1	139365	153040	156631	151237	159493	161095	160668	162183	330169	290089	283194	289933	330174	293459	286553	261464	260928	267809	278752	262980	1	1	96747	98857	137417	127799	148926	117701	98741	1	1	104261	240241
p-Coumaric acid ethyl ester	1	1	1	1	1	1	1	1	1	1	1	1	1	1	1	1	1	1	1	1	1	1	1	1	1	1	1	1	231374	289845	306268	309359	276521	255080	261542	275253	1	1	1	1	185657	184941	188231	182629	1	1	1	1	297812
Caffeine	2216449	1985540	2134033	1953731	1947976	1830985	2189010	2057283	53054640	51766220	51998212	52147728	954502	708210	39775528	39675868	40961600	1040706	1036601	44302208	1120057	983186	1038157	887187	2284991	2011055	2219134	1944119	2070149	1641965	1784179	1979151	70140472	69271736	68391304	68541056	372071	46711676	61745116	61288712	69813008	1038117	1179587	1210255	737504	856243	873491	840359	1906099
p-HPEA-AC	645516	646993	644753	625822	597944	610736	594308	582515	583472	576902	564608	572136	428989	437448	405640	406082	441856	447780	469674	473848	521118	524761	534144	531069	876734	853484	854229	828139	436889	414643	429618	416386	406191	404915	394831	388057	162799	171478	274369	279163	342645	349403	342213	317928	1	1	274128	276462	487105
Furfuryl isovalerate	1	1	1	1	1	1	1	1	1	1	1	1	1	1	1	1	1	1	1	1	1	1	1	1	1	1	1	1	1	1	1	1	1	1	1	1	1	1	1	1	1	1	1	1	1	1	1	1	1
N-(carboxymethyl)lysine	1619573	1519861	1376051	1359868	1528620	1394855	1408267	1419824	1553659	1446269	1531428	1650178	387382	390578	263757	348862	201859	216401	233762	441506	453980	195253	265253	216651	1322844	1176680	1129840	1149592	1520950	970838	1397920	1302965	1515234	844177	695885	1479296	1	1	193102	450710	377298	627598	659017	589876	399435	393873	395766	159138	1276538
O-Methylcorypalline	2932434	2801622	2666357	2688498	2801696	2658527	2641397	2622263	2603988	2613953	2639600	2659728	1872616	1950533	1765397	1768211	1513360	1525151	1624078	1625317	1360609	1436434	1463900	1462398	3606937	3186860	3310705	3310408	2831200	2555174	2871748	2836716	2714432	2688172	2631141	2613717	863157	959630	1740187	1722794	1808092	1822784	1786850	1753130	1364877	1379374	1383087	1379202	3407295
N6-Acetyl lysine	1	1	1	1	1	1	1	1	1	1	1	1	1	1	1	1	1	1	1	1	1	1	1	1	1	1	1	1	342774	306078	364677	308656	254531	255443	253041	266624	1	1	1	1	1	1	1	1	1	1	1	1	290988
Bis(2-furanylmethyl) disulfide	1	1	1	1	1	1	1	1	1	1	1	1	301700	305497	277880	264168	1	329204	345837	341177	333090	325714	343936	354662	1	1	1	1	1	1	1	1	1	1	1	1	1	1	1	1	1	1	1	1	1	1	1	1	1
damascenone	346053	306095	149838	269366	312031	272665	140912	277516	296059	140570	155870	158115	120998	108146	94052	101741	121515	112362	126409	129419	134475	138999	149867	157104	288785	248366	465559	120214	647582	561159	335605	587354	252779	558744	294438	282067	1	1	131567	140417	254396	255492	268448	255969	156725	155376	154828	150915	250617
Pinosylvin	420014	282372	54495432	53916048	362632	446879	52975656	281379	52160012	51239028	51130600	51614444	41222688	43215504	39543896	39411704	40195876	42289752	43393824	43912612	42343064	44049136	44894392	44624388	52767200	49766528	314772	378568	537154	619092	398169	948853	988283	633098	831112	994520	43822024	46862644	61513520	61082096	235666	376898	275192	191076	62586592	63418392	63138136	62713084	780291
N-(carboxyethyl)lysine	1	203749	1	1	226583	1	1	173968	196438	199410	216385	1	1	1	1	1	1	1	1	1	1	1	1	1	155603	155130	150918	147268	325536	255218	269082	252223	229640	228188	249098	267701	1	1	1	1	1	1	1	1	1	1	1	1	1
4-Vinylsyringol	319729	301450	265167	258018	291352	280618	277724	268979	283250	270264	275317	276517	1	1	1	1	1	1	1	1	1	1	1	1	232928	202938	209313	190272	283532	243716	264315	251321	277939	270270	283257	276027	1	1	1	1	1	1	1	1	1	1	1	1	209715
Thalictroidine	1	1	1	1	1	1	1	1	1	1	1	1	1	1	1	1	1	1	1	1	1	1	1	1	1	1	192682	185099	1	1	1	1	1	1	1	1	1	1	1	1	1	1	1	1	1	1	1	1	1
Pterostilbene	582372	204267	174403	153955	166882	162093	161363	153510	157403	143185	133485	329967	1	1	1	1	1	1	1	1	1	1	1	1	1	1	1	1	168860	144330	152029	148708	113732	119952	112386	116920	1	1	1	1	1	1	1	1	1	1	1	1	1
threo-Syringoylglycerol	1564181	1502343	1454042	1477518	1439328	1428843	1431392	1363021	1462483	1373587	1389138	1406207	1155967	1197329	1130772	1177800	1235785	1279026	1281169	1272428	938767	981747	1021021	1007274	1669263	1533923	1533608	1463728	2808832	2673818	3173178	3103112	3144842	3177472	2933453	2877420	1382301	1523756	2349841	2260407	2427412	2392395	2376710	2307200	2176106	2154133	2174620	2165305	3126880
erythro-Syringoylglycerol	1564181	1502343	1454042	1477518	1439328	1428843	1431392	1363021	1462483	1373587	1389138	1406207	1155967	1197329	1130772	1177800	1235785	1279026	1281169	1272428	938767	981747	1021021	1007274	1669263	1533923	1533608	1463728	2808832	2673818	3173178	3103112	3144842	3177472	2933453	2877420	1382301	1523756	2349841	2260407	2427412	2392395	2376710	2307200	2176106	2154133	2174620	2165305	3126880
Lactucin	181262	171831	171716	172500	184650	177537	174473	174173	169170	153583	158195	161083	1	1	1	1	1	1	1	1	1	1	1	1	172576	1	143463	1	1	1	1	1	1	1	1	1	1	1	1	1	1	1	1	1	1	1	1	1	1
(R)-Roemerine	221741	223475	181791	183026	197811	190401	192502	180766	185237	169257	172270	174987	1	1	1	1	1	1	1	1	1	1	1	1	193239	177461	172094	179249	443014	390718	419027	407970	370526	375194	380940	371068	1	1	1	1	214559	208206	208717	203901	1	1	153075	1	362476
(R)-Higenamine	1	1	1	1	1	1	1	1	1	1	1	1	1	1	1	1	1	1	1	1	1	1	1	1	1	1	1	1	1	1	1	1	1	1	1	1	1	1	1	1	1	1	1	1	1	1	1	1	148499
Floribundine	148178	148718	137163	128384	134236	129790	127579	129046	139434	125958	125474	135077	1	1	1	1	1	1	1	1	1	1	1	1	1	1	1	1	121133	109154	119329	112148	122880	1	123035	123498	1	1	1	1	1	1	1	1	1	1	1	1	114572
Bisdemethoxycurcumin	1	1	1	1	1	1	1	1	1	1	1	1	1	1	1	1	1	1	1	1	1	1	1	1	1	1	1	1	1	1	1	1	1	1	1	1	1	526059	1	1	1	1	1	1	1	1	1	1	1
(+)-Catechin	1	1	1	1	1	1	1	1	1	1	1	1	1	1	1	1	1	1	1	1	1	1	1	1	1	1	1	1	166874	154270	1	1	1	1	1	1	1	526059	1	1	1	1	1	1	1	1	1	1	1
(-)-Epicatechin	1	1	1	1	1	1	1	1	1	1	1	1	1	1	1	1	1	1	1	1	1	1	1	1	1	1	1	1	166874	154270	1	1	1	1	1	1	1	526059	1	1	1	1	1	1	1	1	1	1	1
Cirsimaritin	440783	416302	405097	402751	450261	417883	415066	408934	426525	392438	380275	387259	1	1	1	1	1	1	1	1	1	1	1	1	428155	377276	358494	362587	1	166703	1	1	1	1	1	1	1	1	1	1	1	1	1	1	1	1	1	1	1
Caffeoyl aspartic acid	446096	420952	404945	407926	452689	422555	417524	407561	428322	396489	384504	390105	1	1	1	1	1	1	1	1	1	1	1	1	484740	1	400111	407655	1	180265	1	1	1	1	1	1	1	1	1	1	1	1	1	1	1	1	1	1	1
p-Coumaroyl tartaric acid	456381	438549	424391	425099	474362	417883	423239	428615	426525	406500	400292	387259	1	1	1	1	1	1	1	1	1	1	1	1	495405	435983	414606	404819	1	1	1	1	1	1	1	1	1	1	1	1	1	1	1	1	1	1	1	1	1
Nepetin	136798	124869	112601	115202	108977	115123	102084	117455	100167	110150	93110	92745	140117	140483	120205	127933	100473	100119	105650	104433	122509	141748	144768	141511	1	1	1	233642	81565	70727	1	1	1	1	1	1	1	1	97450	97131	85250	78685	1	1	1	1	1	1	154506
Isorhamnetin	136798	124869	112601	115202	108977	115123	102084	117455	100167	110150	93110	92745	140117	140483	120205	127933	100473	100119	105650	104433	122509	141748	144768	141511	1	1	1	233642	81565	70727	1	1	1	1	1	1	1	1	97450	97131	85250	78685	1	1	1	1	1	1	154506
Rhamnetin	136798	124869	112601	115202	108977	115123	102084	117455	100167	110150	93110	92745	140117	140483	120205	127933	100473	100119	105650	104433	122509	141748	144768	141511	1	1	1	233642	81565	70727	1	1	1	1	1	1	1	1	97450	97131	85250	78685	1	1	1	1	1	1	154506
Epirosmanol	199000	197919	195888	195124	164053	157002	157438	161690	169147	164307	162005	165650	1	1	1	1	1	1	139534	1	1	136846	1	141895	246479	232896	244101	246909	1	1	1	1	1	1	1	1	1	1	1	1	1	1	1	1	1	1	1	1	1
Rosmanol	199000	197919	195888	195124	164053	157002	157438	161690	169147	164307	162005	165650	1	1	1	1	1	1	139534	1	1	136846	1	141895	246479	232896	244101	246909	1	1	1	1	1	1	1	1	1	1	1	1	1	1	1	1	1	1	1	1	1
trans-Chlorogenic acid	1	1	1	1	1	1	1	1	1	1	1	1	1	1	1	1	1	1	1	1	1	1	1	1	1	1	1	1	435153	384178	1	1	1	1	1	1	1	1	1	1	227842	1	1	1	1	1	1	1	1
5-Caffeoylquinic acid	354485	345261	345626	348605	331787	325422	334027	327565	335549	321563	334562	316360	1	1	1	1	1	1	1	1	1	1	1	1	317992	289755	292924	287580	435153	384178	409603	392034	397426	386508	375645	374098	1	1	1	1	227842	1	1	1	1	1	1	1	340253
3-Caffeoylquinic acid	354485	345261	345626	348605	331787	325422	334027	327565	335549	321563	334562	316360	1	1	1	1	1	1	1	1	1	1	1	1	317992	289755	292924	287580	435153	384178	409603	392034	397426	386508	375645	374098	1	1	1	1	227842	1	1	1	1	1	1	1	340253
Cryptochlorogenic acid	354485	345261	345626	348605	331787	325422	334027	327565	335549	321563	334562	316360	1	1	1	1	1	1	1	1	1	1	1	1	317992	289755	292924	287580	435153	384178	409603	392034	397426	386508	375645	374098	1	1	1	1	227842	1	1	1	1	1	1	1	340253
4-Caffeoylquinic acid	354485	345261	345626	348605	331787	325422	334027	327565	335549	321563	334562	316360	1	1	1	1	1	1	1	1	1	1	1	1	317992	289755	292924	287580	435153	384178	409603	392034	397426	386508	375645	374098	1	1	1	1	227842	1	1	1	1	1	1	1	340253
1-O-Caffeoylquinic acid	354485	345261	345626	348605	331787	325422	334027	327565	335549	321563	334562	316360	1	1	1	1	1	1	1	1	1	1	1	1	317992	289755	292924	287580	435153	384178	409603	392034	397426	386508	375645	374098	1	1	1	1	227842	1	1	1	1	1	1	1	340253
trans-Neochlorogenic acid	354485	345261	345626	348605	331787	325422	334027	327565	335549	321563	334562	316360	1	1	1	1	1	1	1	1	1	1	1	1	317992	289755	292924	287580	435153	384178	409603	392034	397426	386508	375645	374098	1	1	1	1	227842	1	1	1	1	1	1	1	340253
Leonuriside A	354485	345261	1101675	348038	352816	325422	334027	327321	335549	321313	334562	316360	1104861	1136073	1061853	1045646	1087492	1105693	1156424	1139240	1085801	1099729	1123633	1143053	317992	289755	292924	880399	496284	453133	409603	392034	397426	386508	1088494	374098	921901	996885	1	1372018	1415375	1	1486299	1389407	1308315	1374550	1359843	1390916	340253
Ferulic acid 4-O-glucoside	1	1	1	1	1	1	1	1	246294	1	1	1	1	1	1	1	1	1	1	1	1	1	1	1	1	1	1	1	1	1	1	1	1	254445	1	251889	1	1	1	1	1	1	290454	1	1	1	1	1	206746
Feruloyl glucose	1	1	1	1	1	1	1	1	246294	1	1	1	1	1	1	1	1	1	1	1	1	1	1	1	1	1	1	1	1	1	1	1	1	254445	1	251889	1	1	1	1	1	1	290454	1	1	1	1	1	206746
Esculin	1	1	1	1	1	1	1	1	1	1	1	1	1	1	1	1	1	1	445852	435861	1	414319	427805	441303	1	1	1	1	1	1	1	1	1	1	1	1	1	1	396438	403885	1	416150	1	1	1	355893	361122	1	1
p-HPEA-EA	1	1	1	1	1	1	1	1	1	1	1	1	1	1	1	1	1	1	1	1	1	1	1	1	1	1	1	1	1725143	1619051	1591574	1560070	1424149	1398849	1370173	1360191	585337	611809	1040857	1041038	1242514	1221231	1235621	1162557	937170	939665	941837	943308	1348986
Ligstroside-aglycone	1	1	1	1	1	1	1	1	1	1	1	1	1	1	1	1	1	1	1	1	1	1	1	1	1	1	1	1	1725143	1619051	1591574	1560070	1424149	1398849	1370173	1360191	585337	611809	1040857	1041038	1242514	1221231	1235621	1162557	937170	939665	941837	943308	1348986
N-Caffeoyltryptophan	1	1	1	1	1	1	1	1	1	1	1	1	1	1	1	1	1	1	1	1	1	1	1	1	1	1	1	1	1725143	1619051	1591574	1560070	1424149	1398849	1370173	1360191	609009	642412	1065306	1064481	1253372	1232654	1252534	1168001	966100	970429	965501	967174	1348986
Curcumin	184165	173862	153857	155022	167474	158359	162288	151400	160867	154858	156662	155132	1	1	1	1	1	1	1	1	1	1	1	1	1	1	1	213913	316006	293779	293124	1	1	1	1	1	1	1	1	1	1	1	1	1	1	1	1	1	1
(R)-2-Hydroxy-4,7-dimethoxy-2H-1,4-benzoxazin-3(4H)-one 2-glucoside	352996	356572	340192	342107	362057	351990	343081	338627	329404	322408	306602	326969	199985	213385	1	183557	209502	203997	207221	210012	200453	199026	212788	216901	285609	272416	282866	268986	928391	869083	831264	814646	761353	768387	763721	758682	344658	372659	624487	632903	695062	702096	706492	644859	587493	596063	602442	585978	685459
Na-p-Hydroxycoumaroyltryptophan	317465	174787	151490	283724	301915	154512	157494	147026	163499	152801	152061	316360	1104861	1136073	1061853	1045646	1087492	1105693	1156424	1139240	1085801	1099729	1123633	1143053	246220	226998	230129	214882	1115519	1053704	1069041	1052387	929445	915214	884101	895331	317797	340656	566896	576758	656514	286682	293063	611441	515617	534269	527202	527473	868423
Dimethylmatairesinol	1	1	1	1	1	1	1	1	1	1	1	1	1	92239	110805	119120	1	1	1	1	1	1	143672	142817	1	1	1	1	1	1	1	1	1	1	1	1	115688	133436	104273	113358	1	1	1	1	104938	120720	115335	115134	1
4-Feruloylquinic acid	309346	313652	310691	306127	324356	321272	301822	303550	293667	289056	272639	297790	245963	264607	242157	238987	255335	244397	261284	267144	253992	249426	264862	271535	258521	246229	250003	238767	186846	1	1	1	1	1	1	1	488017	513078	1	1	1	1	1	1	1	1	1	1	1
3-Feruloylquinic acid	309346	313652	310691	306127	324356	321272	301822	303550	293667	289056	272639	297790	245963	264607	242157	238987	255335	244397	261284	267144	253992	249426	264862	271535	258521	246229	250003	238767	186846	1	1	1	1	1	1	1	488017	513078	1	1	1	1	1	1	1	1	1	1	1
5-Feruloylquinic acid	309346	313652	310691	306127	324356	321272	301822	303550	293667	289056	272639	297790	245963	264607	242157	238987	255335	244397	261284	267144	253992	249426	264862	271535	258521	246229	250003	238767	186846	1	1	1	1	1	1	1	488017	513078	1	1	1	1	1	1	1	1	1	1	1
3-O-Feruloylquinic acid	309346	313652	310691	306127	324356	321272	301822	303550	293667	289056	272639	297790	245963	264607	242157	238987	255335	244397	261284	267144	253992	249426	264862	271535	258521	246229	250003	238767	186846	1	1	1	1	1	1	1	488017	513078	1	1	1	1	1	1	1	1	1	1	1
Coffeasterene	1	1	1	1	1	1	1	1	1	1	1	1	1	1	1	1	1	1	1	1	1	1	1	1	305892	297033	281018	283215	1	1	1	1	1	1	1	1	1	1	1	1	1	1	1	1	1	1	1	1	696919
Quercetin 3-O-acetyl-rhamnoside	1	1	1	1	1	1	1	1	1	1	1	1	1	1	1	1	1	1	1	1	1	1	1	1	1	1	1	1	186465	1	1	1	1	1	1	1	1	1	1	1	1	1	1	1	1	1	1	1	1
Kaempferol 3-O-acetyl-glucoside	1	1	1	1	1	1	1	1	1	1	1	1	1	1	1	1	1	1	1	1	1	1	1	1	1	1	1	1	186465	1	1	1	1	1	1	1	1	1	1	1	1	1	1	1	1	1	1	1	1
4,5-Dicaffeoylquinic acid	1	1	1	1	1	1	1	1	1	1	1	1	1	1	1	1	1	1	1	1	1	1	1	1	1	1	1	1	93081	84330	81515	1	1	1	1	1	1	1	1	1	1	1	1	1	1	1	1	1	1
3,4-Dicaffeoylquinic acid	1	1	1	1	1	1	1	1	1	1	1	1	1	1	1	1	1	1	1	1	1	1	1	1	1	1	1	1	93081	84330	81515	1	1	1	1	1	1	1	1	1	1	1	1	1	1	1	1	1	1
3,5-Di-O-caffeoylquinic acid	1	1	1	1	1	1	1	1	1	1	1	1	1	1	1	1	1	1	1	1	1	1	1	1	1	1	1	1	93081	84330	81515	1	1	1	1	1	1	1	1	1	1	1	1	1	1	1	1	1	1
3,5-Dicaffeoylquinic acid	1	1	1	1	1	1	1	1	1	1	1	1	1	1	1	1	1	1	1	1	1	1	1	1	1	1	1	1	93081	84330	81515	1	1	1	1	1	1	1	1	1	1	1	1	1	1	1	1	1	1
4,5-Di-O-caffeoylquinic acid	1	1	1	1	1	1	1	1	1	1	1	1	1	1	1	1	1	1	1	1	1	1	1	1	1	1	1	1	93081	84330	81515	1	1	1	1	1	1	1	1	1	1	1	1	1	1	1	1	1	1
b-D-Glucuronopyranosyl-(1-3)-a-D-galacturonopyranosyl-(1-2)-L-rhamnose	1	1	1	1	1	1	1	1	1	1	1	1	1	1	1	1	1	1	1	1	1	1	1	1	1	1	1	1	93081	84330	81515	1	1	1	1	1	1	1	1	1	1	1	1	1	1	1	1	1	1
4-Demethylsimmondsin 2'-(E)-ferulate	1	1	1	1	1	1	1	1	1	1	1	1	1	1	1	1	1	1	1	1	1	1	1	1	1	1	1	1	1	1	1	139937	1	1	1	1	1	1	1	1	1	1	1	1	1	1	1	1	1
3-Demethylsimmondsin 2'-(Z)-ferulate	1	1	1	1	1	1	1	1	1	1	1	1	1	1	1	1	1	1	1	1	1	1	1	1	1	1	1	1	1	1	1	139937	1	1	1	1	1	1	1	1	1	1	1	1	1	1	1	1	1
24-Methylcholestanol ferulate	1	1	1	1	1	1	1	1	1	1	1	1	1	1	1	1	1	1	1	1	1	1	1	1	150238	1	1	1	1	1	1	1	1	1	1	1	1	1	1	1	1	1	1	1	1	1	1	1	1
Neodiosmin	341817	311138	322975	310641	335650	320664	315260	320066	316046	305993	325695	305916	402803	407579	419124	441101	361208	398696	411181	422612	403922	428585	446517	416400	268478	270645	247968	257834	403553	369141	326445	305680	306928	303582	298583	291646	406817	427902	401322	432419	413900	421575	412194	408312	436258	427451	424121	437717	264229
Diosmin	341817	311138	322975	310641	335650	320664	315260	320066	316046	305993	325695	305916	402803	407579	419124	441101	361208	398696	411181	422612	403922	428585	446517	416400	268478	270645	247968	257834	403553	369141	326445	305680	306928	303582	298583	291646	406817	427902	401322	432419	413900	421575	412194	408312	436258	427451	424121	437717	264229
Pigment A	495578	458784	461534	444867	494032	470192	473125	463016	458111	456125	478274	455831	586248	612093	624842	656407	539813	576427	607859	617032	580079	632777	651811	602472	386913	387432	363762	360817	598452	546049	487033	445630	444254	444313	437214	424281	596971	633918	602893	625157	628854	623403	614814	604277	618065	615600	619939	636663	382054
Peonidin 3-O-(6''-p-coumaroyl-glucoside)	495578	458784	461534	444867	494032	470192	473125	463016	458111	456125	478274	455831	586248	612093	624842	656407	539813	576427	607859	617032	580079	632777	651811	602472	386913	387432	363762	360817	598452	546049	487033	445630	444254	444313	437214	424281	596971	633918	602893	625157	628854	623403	614814	604277	618065	615600	619939	636663	382054
Peonidin 3-O-rutinoside	495578	458784	461534	444867	494032	470192	473125	463016	458111	456125	478274	455831	586248	612093	624842	656407	539813	576427	607859	617032	580079	632777	651811	602472	386913	387432	363762	360817	598452	546049	487033	445630	444254	444313	437214	424281	596971	633918	602893	625157	628854	623403	614814	604277	618065	615600	619939	636663	382054
Neohesperidin	571546	539575	542740	517636	575182	554875	559999	549259	535575	536922	557312	536179	700751	728824	747877	789513	637841	687102	722970	731239	685808	758088	774370	719757	452450	452898	419243	417570	711396	653509	571332	525532	522826	521200	508494	494724	705784	752873	709385	743794	747450	747097	730457	726598	744040	745690	731059	755761	445870
Hesperidin	571546	539575	542740	517636	575182	554875	559999	549259	535575	536922	557312	536179	700751	728824	747877	789513	637841	687102	722970	731239	685808	758088	774370	719757	452450	452898	419243	417570	711396	653509	571332	525532	522826	521200	508494	494724	705784	752873	709385	743794	747450	747097	730457	726598	744040	745690	731059	755761	445870
Delphinidin 3-O-rutinoside	229728	228436	219765	206995	239532	234211	244740	229193	219530	230929	231617	230263	319513	321246	328753	359830	276633	288405	311790	319293	292215	341130	338444	303357	183973	182253	171275	159736	307843	284367	244887	219852	215898	217618	209911	203078	298967	324971	308063	332483	333550	325522	318262	318285	328785	328470	306937	328373	181641
Cyanidin 3,5-O-diglucoside	229728	228436	219765	206995	239532	234211	244740	229193	219530	230929	231617	230263	319513	321246	328753	359830	276633	288405	311790	319293	292215	341130	338444	303357	183973	182253	171275	159736	307843	284367	244887	219852	215898	217618	209911	203078	298967	324971	308063	332483	333550	325522	318262	318285	328785	328470	306937	328373	181641
Cyanidin 3-O-sophoroside	229728	228436	219765	206995	239532	234211	244740	229193	219530	230929	231617	230263	319513	321246	328753	359830	276633	288405	311790	319293	292215	341130	338444	303357	183973	182253	171275	159736	307843	284367	244887	219852	215898	217618	209911	203078	298967	324971	308063	332483	333550	325522	318262	318285	328785	328470	306937	328373	181641
Delphinidin 3,5-O-diglucoside	1	1	1	1	1	1	1	1	1	1	1	1	586248	1	1	656407	1	1	1	617032	580079	632777	651811	1	1	1	1	1	1	1	1	1	1	1	1	1	1	1	1	625157	1	1	1	1	618065	615600	1	636663	1
Delphinidin 3-O-glucosyl-glucoside	1	1	1	1	1	1	1	1	1	1	1	1	586248	1	1	656407	1	1	1	617032	580079	632777	651811	1	1	1	1	1	1	1	1	1	1	1	1	1	1	1	1	625157	1	1	1	1	618065	615600	1	636663	1
Quercetin 3-O-galactoside 7-O-rhamnoside	571546	539575	542740	517636	575182	554875	559999	549259	535575	536922	557312	536179	700751	728824	747877	789513	637841	687102	722970	731239	685808	758088	774370	719757	452450	452898	419243	417570	711396	653509	571332	525532	522826	521200	508494	494724	705784	752873	709385	743794	747450	747097	730457	726598	744040	745690	731059	755761	445870
Kaempferol 3-O-sophoroside	571546	539575	542740	517636	575182	554875	559999	549259	535575	536922	557312	536179	700751	728824	747877	789513	637841	687102	722970	731239	685808	758088	774370	719757	452450	452898	419243	417570	711396	653509	571332	525532	522826	521200	508494	494724	705784	752873	709385	743794	747450	747097	730457	726598	744040	745690	731059	755761	445870
Quercetin 3-O-rutinoside	571546	539575	542740	517636	575182	554875	559999	549259	535575	536922	557312	536179	700751	728824	747877	789513	637841	687102	722970	731239	685808	758088	774370	719757	452450	452898	419243	417570	711396	653509	571332	525532	522826	521200	508494	494724	705784	752873	709385	743794	747450	747097	730457	726598	744040	745690	731059	755761	445870
Quercetin 3-O-rhamnosyl-galactoside	571546	539575	542740	517636	575182	554875	559999	549259	535575	536922	557312	536179	700751	728824	747877	789513	637841	687102	722970	731239	685808	758088	774370	719757	452450	452898	419243	417570	711396	653509	571332	525532	522826	521200	508494	494724	705784	752873	709385	743794	747450	747097	730457	726598	744040	745690	731059	755761	445870
Kaempferol 3,7-O-diglucoside	571546	539575	542740	517636	575182	554875	559999	549259	535575	536922	557312	536179	700751	728824	747877	789513	637841	687102	722970	731239	685808	758088	774370	719757	452450	452898	419243	417570	711396	653509	571332	525532	522826	521200	508494	494724	705784	752873	709385	743794	747450	747097	730457	726598	744040	745690	731059	755761	445870
Cyanidin 3-O-sambubioside 5-O-glucoside	1	1	1	1	1	1	1	1	1	1	1	1	1	1	1	1	1	1	1	1	1	1	1	1	1	1	1	1	331657	1	1	1	1	1	1	1	1	1	1	1	1	1	1	1	1	1	1	1	1
Quercetin 3-O-xylosyl-rutinoside	1	1	1	1	1	1	1	1	1	1	1	1	1	1	1	1	1	1	1	1	1	1	1	1	1	1	1	1	307378	1	1	1	1	1	1	1	1	1	1	1	1	1	1	1	1	1	1	1	1
Narirutin 4'-O-glucoside	1	1	1	1	1	1	1	1	1	1	1	1	1	1	1	1	1	1	1	1	1	1	1	1	1	1	1	1	307378	299841	267288	257976	237300	253134	219715	228204	1	1	1	1	212811	211080	230396	206183	1	1	1	1	1
1-Sinapoyl-2-feruloylgentiobiose	1	1	1	1	1	1	1	1	1	1	1	1	1	1	1	1	1	1	1	1	1	1	1	1	1	1	1	1	326359	299841	267288	257976	237300	253134	219715	228204	1	1	1	1	212811	211080	230396	206183	1	1	1	1	1
Cyanidin 3-O-xylosyl-rutinoside	1	1	1	1	1	1	1	1	1	1	1	1	1	1	1	1	1	1	1	1	1	1	1	1	1	1	1	1	269101	1	1	1	1	1	1	1	1	1	1	1	1	1	1	1	1	1	1	1	1
Rubrofusarin 6-[glucosyl-(1-3)-glucosyl-(1-6)-glucoside]	1	1	1	1	1	1	1	1	1	1	1	1	91241	96989	107723	101060	1	85608	85560	1	86398	95345	122826	87051	1	1	1	1	85438	1	1	1	1	1	1	1	83193	94631	1	96957	88619	95534	98408	88134	100947	100577	98715	100880	1
Cyanidin 3-O-glucosyl-rutinoside	1	1	1	1	1	1	1	1	1	1	1	1	91241	86282	96718	95653	1	85608	85560	1	1	95345	111578	87051	1	1	1	1	1	1	1	1	1	1	1	1	83193	94631	1	91433	83434	90142	92962	88134	95737	95305	88068	95348	1
1,2-Disinapoylgentiobiose	1	1	1	1	1	1	1	1	1	1	1	1	1	1	1	1	1	1	1	1	1	1	1	1	1	1	1	1	1	1	1	1	1	1	1	1	1	77811	93644	99001	1	1	1	1	114997	114331	117214	113514	1
Metabolite name	Average Mz	Adduct type	Formula	INCHIKEY	Total score	MS1 isotopic spectrum	MS/MS spectrum
Caffeoylcholine	266.136	[M]+	[C14H20NO4]+	HLGBXKIGYXVIFU-UHFFFAOYSA-O	92.8	266.13681:19848 267.14016:8225 268.14352:0	163.03726:588 207.06339:2786
Caffeine	195.086	[M+H]+	C8H10N4O2	RYYVLZVUVIJVGH-UHFFFAOYSA-N	91.7	195.08655:1190269 196.0899:259636 197.09326:19336	138.06511:1681 195.08672:7643 195.15291:353
Phloroglucinol	127.038	[M+H]+	C6H6O3	QCDYQQDYXPDABM-UHFFFAOYSA-N	91.2	127.0381:118229 128.04145:14510 129.04481:0	127.03789:4356
2-Phenylacetamide	136.073	[M+H]+	C8H9NO	LSBDFXRDZJMBSC-UHFFFAOYSA-N	89.6	136.07382:15170 137.07717:0 138.08053:22815	136.06126:1735 136.07405:2935
Cyclo(proline-leucine)	211.142	[M+H]+	C11H18N2O2	SZJNCZMRZAUNQT-UHFFFAOYNA-N	89.6	211.14223:44163 212.14558:11266 213.14894:0	211.0941:280 211.14175:3497
2,6-Xylidine	122.096	[M+H]+	C8H11N	UFFBMTHBGFGIHF-UHFFFAOYSA-N	89.5	122.09566:195256 123.09901:41219 124.10237:0	107.07204:1099 122.09518:7279
Calcium (+)-pantothenate	220.117	[M+H]+	C9H17NO5	GHOKWGTUZJEAQD-ZETCQYMHSA-N	86.7	220.11752:68785 221.12087:12803 222.12423:0	220.11723:2937
3-Indoleacetic acid	176.069	[M+H]+	C10H9NO2	SEOVTRFCIGRIMH-UHFFFAOYSA-N	86.4	176.06915:38942 177.0725:7875 178.07586:0	176.06885:2287 176.1051:1067
4-Aminophenol	110.059	[M+H]+	C6H7NO	PLIKAWJENQZMHA-UHFFFAOYSA-N	86.1	110.0592:245875 111.06255:24273 112.06591:0	110.0586:5358
TRIGONELLINE	138.054	[M+H]+	C7H7NO2	WWNNZCOKKKDOPX-UHFFFAOYSA-N	86.1	138.05438:231806 139.05773:27153 140.06109:0	138.05409:4320
1-(3-(Trifluoromethyl)phenyl)piperazine	231.111	[M+H]+	C11H13F3N2	KKIMDKMETPPURN-UHFFFAOYSA-N	86.1	231.11055:6834 232.1139:0 233.11726:0	231.11058:1981
Cyclohexylamine	100.111	[M+H]+	C6H13N	PAFZNILMFXTMIY-UHFFFAOYSA-N	86	100.11144:29323 101.11479:5766 102.11815:0	100.11144:11082
2,6-Dimethylpyridine	108.08	[M+H]+	C7H9N	OISVCGZHLKNMSJ-UHFFFAOYSA-N	86	108.07994:39304 109.08329:6927 110.08665:0	80.04877:695 108.07965:5282
Choline [M]+	104.106	[M]+	C5H14NO+	OEYIOHPDSNJKLS-UHFFFAOYSA-N	85.9	104.10637:37235 105.10972:0 106.11308:0	104.10631:9809
3-Acetylindole	160.074	[M+H]+	C10H9NO	VUIMBZIZZFSQEE-UHFFFAOYSA-N	85.8	160.07433:19502 161.07768:5867 162.08104:5251	160.0739:3125
Harman	183.09	[M+H]+	C12H10N2	PSFDQSOCUJVVGF-UHFFFAOYSA-N	85.7	183.09009:10730 184.09344:0 185.0968:0	183.09018:4957
L-Tyrosine	182.079	[M+H]+	C9H11NO3	OUYCCCASQSFEME-QMMMGPOBSA-N	85.6	182.07956:10257 183.08291:0 184.08627:0	136.07481:311 164.06876:532 182.07968:1125 182.11642:258
5,6-Dimethylbenzimidazole	147.09	[M+H]+	C9H10N2	LJUQGASMPRMWIW-UHFFFAOYSA-N	85.4	147.09003:8511 148.09338:0 149.09674:0	132.06636:279 147.09001:3861
Dehydrosalsolidine	206.115	[M+H]+	C12H15NO2	VASUQTGZAPZKFK-UHFFFAOYSA-N	85.3	206.11536:18330 207.11871:5331 208.12207:0	206.11519:3736
Harmalol	201.1	[M+H]+	C12H12N2O	CRQDWQWZCNKKAC-UHFFFAOYSA-N	85.2	201.09984:4949 202.10319:0 203.10655:0	201.09935:1814
L-(-)-Phenylalanine	166.085	[M+H]+	C9H11NO2	COLNVLDHVKWLRT-QMMMGPOBSA-N	84.8	166.08467:25079 167.08802:0 168.09138:0	166.08453:4302 166.11981:750
4-Isopropylaniline	136.111	[M+H]+	C9H13N	LRTFPLFDLJYEKT-UHFFFAOYSA-N	84.4	136.11055:33623 137.1139:8276 138.11726:0	107.07143:399 136.07439:569 136.11046:5024
Chlorogenic acid	355.099	[M+H]+	C16H18O9	CWVRJTMFETXNAD-JUHZACGLSA-N	78.6	355.0997:42436 356.10305:14499 357.10641:0	163.03763:9166
N-arachinoyl-5-hydroxytryptamide	471.389	[M+H]+	C30H50N2O2	UDTZTAZZFLXENU-UHFFFAOYSA-N	78.2	471.38901:100908 472.39236:31031 473.39572:0	160.07358:3392 177.10048:693 454.35941:290
6-Methoxy-7-hydroxycoumarin	193.048	[M+H]+	C10H8O4	RODXRVNMMDRFIK-UHFFFAOYSA-N	77.7	193.04794:8102 194.05129:0 195.05465:0	193.04735:1984 193.1311:279
Arachidoyl Ethanolamide	356.347	[M+H]+	C22H45NO2	AUJVQJHODMISJP-UHFFFAOYSA-N	76.3	356.34741:3979 357.35076:0 358.35412:0	356.34839:1474
Pyridoxamine	169.095	[M+H]+	C8H12N2O2	NHZMQXZHNVQTQA-UHFFFAOYSA-N	75.6	169.0956:13017 170.09895:0 171.10231:0	95.05939:336 151.08553:611 169.09555:1234
PC(16:0/0:0)	496.333	[M+H]+	C24H50NO7P	ASWBNKHCZGQVJV-UHFFFAOYSA-N	74.2	496.3338:31794 497.33715:9842 498.34051:0	496.332:1787
4-Hydroxycoumarin	163.038	[M+H]+	C9H6O3	VXIXUWQIVKSKSA-UHFFFAOYSA-N	73.9	163.03754:102040 164.04089:21408 165.04425:0	89.03768:321 117.03215:367 135.04245:722 145.02695:636 163.03716:1189 163.0858:381
4,7-Phenanthroline	181.084	[M+H]+	C12H8N2	DATYUTWESAKQQM-UHFFFAOYSA-N	73.5	181.08372:31410 182.08707:0 183.09043:0	181.08397:2631 181.13023:498
Pyrimidinol	153.101	[M+H]+	C8H12N2O	AJPIUNPJBFBUKK-UHFFFAOYSA-N	69.4	153.10072:11115 154.10407:0 155.10743:0	109.07477:1065 135.09047:1990 153.10086:1326
trans-pterostilbene	257.126	[M+H]+	C16H16O3	VLEUZFDZJKSGMX-ONEGZZNKSA-N	69.1	257.12592:8009 258.12927:0 259.13263:0	257.12646:1913
3-(4-Hydroxyphenyl)-3-oxopropyl beta-D-glucopyranoside	351.103	[M+Na]+	C15H20O8	NPAQHLFPEOMKAL-UXXRCYHCSA-N	67.5	351.10352:7459 352.10687:0 353.11023:0	177.05244:3362 351.10339:687 351.13327:268
CYTIDINE	244.095	[M+H]+	C9H13N3O5	UHDGCWIWMRVCDJ-XVFCMESISA-N	64.1	244.09474:57148 245.09809:16458 246.10145:0	244.09453:4223
Ergocorninine	562.315	[M+H]+	C31H39N5O5	UJYGDMFEEDNVBF-OGGGUQDZSA-N	62.8	562.31262:4638 563.31597:0 564.31933:0	562.31256:1643
2-(hydroxymethyl)-4(3H)-quinazolinone	177.053	[M+H]+	C9H8N2O2	QXGGDTNBLBJSIJ-UHFFFAOYSA-N	56.3	177.05286:6225 178.05621:0 179.05957:0	117.03181:268 145.02713:1130 177.0528:576
3-METHYLADENINE	150.09	[M+H]+	C6H7N5	FSASIHFSFGAIJM-UHFFFAOYSA-N	56.2	150.08968:28974 151.09303:6293 152.09639:0	150.08958:3196
Glucosamine	180.1	[M+H]+	C6H13NO5	MSWZFWKMSRAUBD-IVMDWMLBSA-N	9.1792	180.09996:5880 181.10331:0 182.10667:0	162.08969:384 180.09935:1426
N-Acetylgalactosamine	222.11	[M+H]+	C8H15NO6	OVRNDRQMDRJTHS-RSFXFOPENA-N	9.0733	222.10968:7768 223.11303:0 224.11639:0	162.08983:1928 222.10881:1131
(E,Z)-2,4-Heptadienal	152.105	[M+ACN+H]+	C7H10O	SATICYYAWWYRAM-DNVGVPOPSA-N	9.0077	152.10567:11930 153.10902:0 154.11238:0	81.03282:2255
3-Ethylpyridine	108.08	[M+H]+	C7H9N	MFEIKQPHQINPRI-UHFFFAOYSA-N	8.7922	108.07956:23336 109.08291:0 110.08627:0	80.04874:686 108.07935:4712
trans,trans-hepta-2,4,6-trienoic acid	125.07	[M+H]+	C7H8O2	FUCUVXOXNOUYJN-VNKDHWASSA-N	8.7743	125.0704:9185 126.07375:0 127.07711:0	97.07494:277 125.06997:2630
6,7-dihydroxy-4-methyl-2H-chromen-2-one	193.048	[M+H]+	C10H8O4	KVOJTUXGYQVLAJ-UHFFFAOYSA-N	8.7188	193.04808:14241 194.05143:0 195.05479:0	165.05322:481 175.07428:414 193.0481:3174 193.08389:405
2,3-Diethylpyrazine	137.106	[M+H]+	C8H12N2	GZXXANJCCWGCSV-UHFFFAOYSA-N	8.6911	137.10562:14261 138.10897:0 139.11233:0	122.08283:518 137.10591:3995
L-Malic acid	135.043	[M+H]+	C4H6O5	BJEPYKJPYRNKOW-RUOZJJLTNA-N	8.5694	135.04274:7946 136.04609:0 137.04945:0	89.0378:1653
L-2-Amino-3-methylenehexanoic acid	144.1	[M+H]+	C7H13NO2	ZJMPUKNPMYTOOX-UHFFFAOYNA-N	8.5145	144.10017:5276 145.10352:0 146.10688:0	98.09519:1442
3-deoxy-D-glycero-hexo-2,5-diulosonic acid	177.053	[M+H]+	C6H8O6	IBGYNIRCYXIAON-VKHMYHEASA-N	8.466	177.05254:4111 178.05589:0 179.05925:0	117.03215:388 145.0262:942 177.05209:402
3,4-Dihydroxybenzylamine	140.069	[M+H]+	C7H9NO2	YFMPSMITLLBENU-UHFFFAOYSA-N	8.4646	140.06923:9512 141.07258:0 142.07594:0	122.0223:357 140.06943:3010
1-Deoxynojirimycin	164.105	[M+H]+	C6H13NO4	LXBIFEVIBLOUGU-UHFFFAOYNA-N	8.42	164.10587:20437 165.10922:0 166.11258:0	121.08711:876 164.10576:3049
Phenylpropanolamine	152.105	[M+H]+	C9H13NO	DLNKOYKMWOXYQA-VXNVDRBHSA-N	8.3561	152.10519:19541 153.10854:7432 154.1119:0	134.0582:275 152.10513:4498
L-Acetylcarnitine	204.1	[M+H]+	C9H17NO4	RDHQFKQIGNGIED-UHFFFAOYNA-N	8.3381	204.10068:8382 205.10403:0 206.10739:0	81.03304:572 204.10022:1785
1-O-Caffeoylquinic acid	355.099	[M+H]+	C16H18O9	GWTUHAXUUFROTF-RQOWECAXNA-N	8.3368	355.09839:20192 356.10174:6811 357.1051:0	163.03697:2712
(4S,5S)-4,5-dihydroxy-2,6-dioxohexanoic acid	177.053	[M+H]+	C6H8O6	IMUGYKFHMJLTOU-WVZVXSGGSA-N	8.33	177.05313:45790 178.05648:8908 179.05984:0	89.03793:346 117.03226:881 145.02676:2068 149.05798:270 177.05304:1002
Cnidilide	195.147	[M+H]+	C12H18O2	UXDIXFDKSPCUIX-AXFHLTTASA-N	8.2916	195.14691:4624 196.15026:0 197.15362:0	125.06963:1510 138.06505:493
3,3-Dimethylglutaric acid	161.069	[M+H]+	C7H12O4	DUHQIGLHYXLKAE-UHFFFAOYSA-N	8.2644	161.06871:5140 162.07206:0 163.07542:0	161.06912:1989
5-Methylcytidine	258.11	[M+H]+	C10H15N3O5	ZAYHVCMSTBRABG-JXOAFFINSA-N	8.2623	258.10989:4358 259.11324:0 260.1166:0	134.05905:321 258.10986:1709 258.14621:515
2,2,6,6-Tetramethyl-4-piperidinone	156.137	[M+H]+	C9H17NO	JWUXJYZVKZKLTJ-UHFFFAOYSA-N	8.203	156.13707:21898 157.14042:0 158.14378:0	138.12598:507 156.13724:4846
p-Aminobenzoic acid	138.054	[M+H]+	C7H7NO2	ALYNCZNDIQEVRV-UHFFFAOYSA-N	8.1963	138.05397:193848 139.05732:22108 140.06068:0	92.04802:372 94.06425:264 138.05365:3672
Azelaic acid	189.1	[M+H]+	C9H16O4	BDJRBEYXGGNYIS-UHFFFAOYSA-N	8.1924	189.09991:4187 190.10326:0 191.10662:0	189.0994:1525
3alpha,4,7,7alpha-Tetrahydro-1H-isoindole-1,3(2H)-dione	152.069	[M+H]+	C8H9NO2	CIFFBTOJCKSRJY-UHFFFAOYNA-N	8.1671	152.06923:10807 153.07258:0 154.07594:0	96.04291:376 134.05882:697 152.06946:2432 152.1059:1225
Arecaidine	142.085	[M+H]+	C7H11NO2	DNJFTXKSFAMXQF-UHFFFAOYSA-N	8.1536	142.08521:12866 143.08856:0 144.09192:0	100.07429:259 124.07439:408 142.08549:2120
6-Hydroxynicotinic acid	140.069	[M+H]+	C6H5NO3	BLHCMGRVFXRYRN-UHFFFAOYSA-N	8.1113	140.06956:10837 141.07291:0 142.07627:0	81.03249:354 94.02749:645 122.02271:464 140.06943:4454
N-gondoylethanolamine	354.332	[M+H]+	C22H43NO2	YDKRGMXLBRWZJR-KTKRTIGZSA-N	7.9908	354.332:17104 355.33535:0 356.33871:0	309.27783:256 354.33179:3339
Gentianine	176.069	[M+H]+	C10H9NO2	DFNZYFAJQPLJFI-UHFFFAOYSA-N	7.8164	176.06923:37000 177.07258:10601 178.07594:0	81.03292:18951 176.07019:513
Indole-3-methyl acetate	190.084	[M+H]+	C11H11NO2	KTHADMDGDNYQRX-UHFFFAOYSA-N	7.7787	190.08435:12967 191.0877:0 192.09106:0	81.03219:685 190.08435:2300 190.12949:271
Ixocarpalactone A	505.296	[M+H]+	C28H40O8	PHBPDHFIJFLEGD-UHFFFAOYNA-N	7.6791	505.29648:8324 506.29983:0 507.30319:0	505.2951:1931
N,N'-Bis(gamma-glutamyl)cystine	499.117	[M+H]+	C16H26N4O10S2	GOZJYXJJQVGDOJ-UHFFFAOYNA-N	7.6684	499.11624:4236 500.11959:0 501.12295:0	163.03732:860
Alanylglycine	147.09	[M+H]+	C5H10N2O3	CXISPYVYMQWFLE-UHFFFAOYNA-N	7.6644	147.09015:28675 148.0935:0 149.09686:0	147.09007:3311
3-hydroxy-2-methyl-3-phytyl-2,3-dihydro-1,4-naphthoquinone	469.372	[M+H]+	C31H48O3	OOJSROHRRKVBFW-MNBFGQJISA-N	7.6473	469.37225:5843 470.3756:0 471.37896:0	160.07315:1642
Thymine	127.023	[M+H]+	C5H6N2O2	RWQNBRDOKXIBIV-UHFFFAOYSA-N	7.614	127.02319:63295 128.02654:21012 129.0299:18620	81.01786:399 83.03313:2451 127.02267:342
Argininic acid	176.106	[M+H]+	C6H13N3O3	BMFMQGXDDJALKQ-BYPYZUCNSA-N	7.5763	176.10565:293664 177.109:70411 178.11236:7108	176.10518:6070
Cytidine	244.095	[M+H]+	C9H13N3O5	UHDGCWIWMRVCDJ-NHBCCFCANA-N	7.5664	244.09497:67261 245.09832:19870 246.10168:0	244.09451:4198
3-Indolebutyric acid	204.101	[M+H]+	C12H13NO2	JTEDVYBZBROSJT-UHFFFAOYSA-N	7.5643	204.09996:22690 205.10331:5298 206.10667:0	204.09973:4228
Indole-3-propionic acid	190.084	[M+H]+	C11H11NO2	GOLXRNDWAUTYKT-UHFFFAOYSA-N	7.5563	190.08415:6758 191.0875:0 192.09086:0	190.08421:2069
L,L-Cyclo(leucylprolyl)	211.142	[M+H]+	C11H18N2O2	SZJNCZMRZAUNQT-UHFFFAOYNA-N	7.5254	211.14227:43612 212.14562:5329 213.14898:0	211.14236:2621
LysoPC(18:2(9Z,12Z))	520.332	[M+H]+	C26H50NO7P	SPJFYYJXNPEZDW-FTJOPAKQSA-N	7.5245	520.33264:6254 521.33599:0 522.33935:0	184.07101:1649
2-Methylpiperidine	100.111	[M+H]+	C6H13N	NNWUEBIEOFQMSS-UHFFFAOYNA-N	7.5215	100.11113:25748 101.11448:0 102.11784:0	100.11089:11681
1,2-Dehydrosalsolinol	178.084	[M+H]+	C10H11NO2	DWHSGRLKLUGKOU-UHFFFAOYSA-N	7.4982	178.08408:9536 179.08743:0 180.09079:0	178.084:2840
Pyro-L-glutaminyl-L-glutamine	258.11	[M+H]+	C10H15N3O5	ILAITOFTZJRIFJ-IOMOGOHMNA-N	7.4396	258.1098:12958 259.11315:0 260.11651:0	258.10947:3157
Vitamin K1 epoxide-1,4-diol	493.369	[M+Na]+	C31H50O3	CBCKYHVYINCXKR-LKUDQCMENA-N	7.4379	493.36996:32436 494.37331:9711 495.37667:0	493.36926:2751
Creatinine	114.09	[M+H]+	C4H7N3O	DDRJAANPRJIHGJ-UHFFFAOYSA-N	7.4296	114.08987:8003 115.09322:0 116.09658:0	114.08984:3273
Taurine	126.054	[M+H]+	C2H7NO3S	XOAAWQZATWQOTB-UHFFFAOYSA-N	7.4289	126.05418:44256 127.05753:0 128.06089:0	126.05386:6103
2-Hydroxy-4-imino-2,5-cyclohexadienone	124.075	[M+H]+	C6H5NO2	FYWMPJHTFWPBOS-UHFFFAOYSA-N	7.4249	124.07501:96190 125.07836:7092 126.08172:0	124.07457:4134
Bicine	164.106	[M+H]+	C6H13NO4	FSVCELGFZIQNCK-UHFFFAOYSA-N	7.4166	164.10516:9055 165.10851:0 166.11187:0	164.05054:876 164.10493:3284
L-Thyronine	274.105	[M+H]+	C15H15NO4	KKCIOUWDFWQUBT-YQTOOIBONA-N	7.3968	274.10477:10309 275.10812:0 276.11148:0	274.1041:1597
4-Methoxybenzyl glucoside	301.137	[M+H]+	C14H20O7	GRBSGJQPRONUPW-UHFFFAOYNA-N	7.3535	301.1369:20942 302.14025:0 303.14361:0	301.13589:1554
PS(19:0/0:0)	540.331	[M+H]+	C25H50NO9P	QZTQWDNDCFZUCX-VUEPYQETNA-N	7.3089	540.3327:4113 541.33605:0 542.33941:0	86.09532:881 245.18565:330
4-(3-Methyl-2-butenoxy)isonitrosoacetophenone	234.132	[M+H]+	C13H15NO3	DIKOBVULVNJCCO-NTEUORMPSA-N	7.1673	234.13231:6392 235.13566:0 236.13902:0	234.07437:287 234.1324:1639
L-Carnitine	162.096	[M+H]+	C7H15NO3	PHIQHXFUZVPYII-ZCFIWIBFSA-N	7.1322	162.09798:4911 163.10133:0 164.10469:26844	162.09366:1022
Tsugaric acid A	521.401	[M+Na]+	C32H50O4	FIWGZIBLJWZUEA-UHFFFAOYNA-N	7.0121	521.40131:18024 522.40466:7111 523.40802:0	521.40009:1948
12-Tetradecanoylphorbol 13-acetate	617.41	[M+H]+	C36H56O8	PHEDXBVPIONUQT-QQZQVUMWNA-N	6.9395	617.4101:6537 618.41345:0 619.41681:0	617.40991:1053
L-2-Amino-5-hydroxypentanoic acid	134.095	[M+H]+	C5H11NO3	CZWARROQQFCFJB-UHFFFAOYNA-N	6.9182	134.09488:8643 135.09823:0 136.10159:28458	134.05927:549 134.09467:1212
TG(15:1(9Z)/22:3(10Z,13Z,16Z)/22:6(4Z,7Z,10Z,13Z,16Z,19Z))[iso6]	963.75	[M+Na]+	C62H100O6	LXNCNJWRFAZMNH-IGRQQNCQNA-N	6.5687	963.7525:18655 964.75585:12092 965.75921:0	493.36838:903
TG(18:4(6Z,9Z,12Z,15Z)/19:0/22:6(4Z,7Z,10Z,13Z,16Z,19Z))[iso6]	941.771	[M+H]+	C62H100O6	DHVWGMXYQYKNMT-UVAFKPEKNA-N	6.4344	941.77057:13254 942.77392:9365 943.77728:0	471.38852:1055
[truncated: 4 more columns]

## Sheet: Volcano Plot Arab vs Rob
Moderated T-Test [Arabica] Vs [Robusta] P <= 0.05 FC >=1.2
Compound	p-value (Corr)	Regulation	Fold Change
2-Methyl-5-vinylpyrazine	0.0182847	down	-1.26863
(1-Methylethenyl)pyrazine	0.0182847	down	-1.26863
1-Propenylpyrazine	0.0182847	down	-1.26863
2-Isopropyl-5-methylpyrazine	0.00788072	down	-1.32438
2-Methyl-3-(2-methylpropyl)pyrazine	0.0109276	down	-1.34541
3,5-Diethyl-2-methylpyrazine	0.0030148	down	-1.3687
2,3-Diethyl-5-methylpyrazine	0.0030148	down	-1.3687
Hydroxytyrosol	0.0186638	down	-1.40379
Isoferulic acid	0.0186638	down	-1.40384
Ferulic acid	0.0186638	down	-1.40384
2,5-Diethyl-3-methylpyrazine	0.00687538	down	-1.43555
threo-Syringoylglycerol	0.000140036	down	-1.6982
erythro-Syringoylglycerol	0.000140036	down	-1.6982
(R)-Roemerine	0.000140036	down	-1.72641
Tetramethylpyrazine	0.0156893	down	-1.78493
3-Ethyl-2,5-dimethylpyrazine	0.0093905	down	-1.84739
Coffeasterene	1.23906e-05	down	-1.95685
(R)-2-Hydroxy-4,7-dimethoxy-2H-1,4-benzoxazin-3(4H)-one 2-glucoside	8.515e-06	down	-2.01846
Na-p-Hydroxycoumaroyltryptophan	1.73036e-06	down	-3.10947
Caffeine	0.0448518	down	-10.8112
Compound	p-value (Corr)	Regulation	Fold Change
p-HPEA-AC	3.81352e-06	up	2.13786
5-Methylquinoxaline	0.000140036	up	1.88541
3,5-Dimethyl-1,2-cyclopentanedione	5.13901e-05	up	1.83572
3-Ethyl-1,2-cyclopentanedione	5.13901e-05	up	1.83572
3,4-Dimethyl-1,2-cyclopentanedione	5.13901e-05	up	1.83572
3-Methyl-1,2-cyclohexanedione	5.13901e-05	up	1.83572
Nepetin	0	up	1.79725
Isorhamnetin	0	up	1.79725
Rhamnetin	0	up	1.79725
3-Mercapto-3-methyl-1-butanol	0.00155922	up	1.74799
2-Methylbenzaldehyde	0.00155922	up	1.74799
4-(Methylthio)-1-butanol	0.00155922	up	1.74799
4-Methylbenzaldehyde	0.00155922	up	1.74799
3-Methylbenzaldehyde	0.00155922	up	1.74799
Phenylacetaldehyde	0.00155922	up	1.74799
4-Vinylphenol	0.00155922	up	1.74799
2-Ethyl-5-methylpyridine	0	up	1.73951
Vanillic acid	0.00141857	up	1.66182
3,4-Dihydroxyphenylacetic acid	0.00141857	up	1.66182
3-Ethylpyridine	0.00120138	up	1.61191
3-Ethyl-pyridine	0.00120138	up	1.61191
Ethyl acetoacetate	0	up	1.57008
L-Homoserine	0.00135942	up	1.55037
2-[(Methylthio)methyl]-2-butenal	0	up	1.52163
Sinapaldehyde	0.00155922	up	1.47372
Caffeic acid ethyl ester	0.00155922	up	1.47372
3-Mercapto-3-methylbutyl formate	0	up	1.45903
4-Ethyl-2-methyloxazole	0.00235966	up	1.41723
2-Ethyl-5-methyloxazole	0.00235966	up	1.41723
2-Ethyl-4-methyloxazole	0.00235966	up	1.41723
2-Acetyl-1-pyrroline	0.00271931	up	1.40253
5-Ethyl-2-methyloxazole	0.00281982	up	1.39838
5-Ethyl-4-methyloxazole	0.00281982	up	1.39838
Dihydroactinidiolide	0.0117092	up	1.30117
2,5-Diethylthiazole	0.00561729	up	1.25841
4-Ethyl-2,5-dimethylthiazole	0.00561729	up	1.25841
2-Isobutylthiazole	0.00561729	up	1.25841
2,4-Diethylthiazole	0.00561729	up	1.25841
5-Ethyl-2,4-dimethylthiazole	0.00561729	up	1.25841
2-Ethyl-4,5-dimethylthiazole	0.00561729	up	1.25841
2-Isopropyl-4-methylthiazole	0.00561729	up	1.25841
4-Vinylsyringol	0.0186638	up	1.25704
2,5-Diethylpyrazine	0.022929	up	1.22482
1-Phenyl-1-propanone	0.0391817	up	1.21843
Calystegine A6	0.0229073	up	1.21677
Neodiosmin	0.00296767	up	1.20907
Diosmin	0.00296767	up	1.20907
(+)-Catechin	0.00120138	up	1.2049
Quercetin 3-O-xylosyl-rutinoside	0.00120138	up	1.2049
Glyoxal lysine dimer	0.00120138	up	1.2049
trans-Chlorogenic acid	0.00120138	up	1.2049
Rubrofusarin 6-[glucosyl-(1-3)-glucosyl-(1-6)-glucoside]	0.00120138	up	1.2049
4,5-Dicaffeoylquinic acid	0.00120138	up	1.2049
Bisdemethoxycurcumin	0.00120138	up	1.2049
Pterostilbene	0.00120138	up	1.2049
3,4-Dicaffeoylquinic acid	0.00120138	up	1.2049
3,5-Di-O-caffeoylquinic acid	0.00120138	up	1.2049
Narirutin 4'-O-glucoside	0.00120138	up	1.2049
Cyanidin 3-O-glucosyl-rutinoside	0.00120138	up	1.2049
3,5-Dicaffeoylquinic acid	0.00120138	up	1.2049
(-)-Epicatechin	0.00120138	up	1.2049
4-Demethylsimmondsin 2'-(E)-ferulate	0.00120138	up	1.2049
Quercetin 3-O-acetyl-rhamnoside	0.00120138	up	1.2049
4,5-Di-O-caffeoylquinic acid	0.00120138	up	1.2049
Cyanidin 3-O-xylosyl-rutinoside	0.00120138	up	1.2049
Kaempferol 3-O-acetyl-glucoside	0.00120138	up	1.2049
3-Demethylsimmondsin 2'-(Z)-ferulate	0.00120138	up	1.2049
Cyanidin 3-O-sambubioside 5-O-glucoside	0.00120138	up	1.2049
1,2-Disinapoylgentiobiose	0.00120138	up	1.2049
1-Sinapoyl-2-feruloylgentiobiose	0.00120138	up	1.2049
Dimethylmatairesinol	0.00120138	up	1.2049
b-D-Glucuronopyranosyl-(1-3)-a-D-galacturonopyranosyl-(1-2)-L-rhamnose	0.00120138	up	1.2049

## Sheet: Validation OPLSDA
M1	SS	DF	MS	F	p-value	SD
Total corr.	129	129	1			1
Regression	88836	30	2961	7298	2.15 x 10-14	1720
Residual	40164	99	0.405			0.636
